# Supplementary material for: ITGB1 Drives Hepatocellular Carcinoma Progression by Modulating Cell Cycle Process Through PXN/YWHAZ/AKT Pathways
Source: Frontiers journal article supplement (doi:10.3389/fcell.2021.711149), 2021-12-17
Supplement: Data_Sheet_1.PDF [file Data_Sheet_1.PDF]

Table 1. Comparison of clinical characteristics between low ITGB1 group and high ITGB1 group in LIHC cohort

| Variable               | ITGB1       |             | Case NO. | P     |
|------------------------|-------------|-------------|----------|-------|
|                        | high        | low         |          |       |
| Age ( <u>mean±SD</u> ) | 66.39±12.98 | 61.23±13.72 |          | 0.313 |
| Gender                 |             |             |          | 0.014 |
| Male                   | 116         | 133         | 249      |       |
| Female                 | 69          | 51          | 120      |       |
| Pathologic stage       |             |             |          | 0.012 |
| I/II                   | 117         | 140         | 257      |       |
| III/IV                 | 52          | 36          | 88       |       |
| NA                     | 16          | 8           | 24       |       |
| Living status          |             |             |          | 0.197 |
| Living                 | 114         | 124         | 238      |       |
| Deceased               | 69          | 60          | 129      |       |
