# Supplementary material for: ITGB1 Drives Hepatocellular Carcinoma Progression by Modulating Cell Cycle Process Through PXN/YWHAZ/AKT Pathways
Source: Front Cell Dev Biol. 2021 Dec 17;9:711149. doi: 10.3389/fcell.2021.711149 (PMC8718767; doi:10.3389/fcell.2021.711149)
Supplement: Supplementary file 4 [file Table9.XLSX]

## Sheet: Sheet1
id	baseMean	log2FoldChange	lfcSE	stat	pvalue	padj
GABRD	93.7157	4.60422	0.236006	19.5089	9.23e-85	3.06e-80
THBS4	526.922	5.99281	0.325558	18.4078	1.14e-75	1.89e-71
EBF2	31.0599	5.46838	0.307504	17.7831	9.55e-71	1.06e-66
PLVAP	2985.19	3.16559	0.18092	17.4972	1.51e-68	1.25e-64
CDKN3	168.604	3.63039	0.209982	17.2891	5.69e-67	3.77e-63
SLC26A6	516.655	2.40005	0.140128	17.1275	9.26e-66	5.12e-62
COL15A1	576.051	3.82754	0.223914	17.0938	1.65e-65	7.81e-62
CDCA5	252.206	3.18471	0.193779	16.4348	1.08e-60	4.47e-57
ADAMTS13	1074.19	-2.97796	0.182741	-16.296	1.05e-59	3.88e-56
KIF2C	201.475	3.73351	0.229411	16.2743	1.5e-59	4.98e-56
KIF4A	227.548	3.74154	0.230189	16.2542	2.08e-59	6.28e-56
KIFC1	280.512	3.41452	0.210204	16.2438	2.47e-59	6.83e-56
BIRC5	419.209	3.64997	0.226028	16.1483	1.17e-58	2.98e-55
CCNB1	417.644	2.94086	0.182224	16.1387	1.36e-58	3.23e-55
CD34	1249.26	2.22107	0.137904	16.1059	2.32e-58	5.13e-55
CENPF	483.287	3.71052	0.231501	16.0281	8.13e-58	1.69e-54
CENPA	55.1753	3.6916	0.232279	15.893	7.09e-57	1.38e-53
PRC1	382.117	3.01275	0.191063	15.7684	5.13e-56	9.45e-53
CDC25C	95.3225	4.19578	0.266355	15.7526	6.59e-56	1.15e-52
TROAP	153.158	3.75057	0.238137	15.7496	6.91e-56	1.15e-52
SKA1	92.6253	4.09491	0.26031	15.7309	9.28e-56	1.47e-52
PTTG1	309.7	3.33822	0.212401	15.7166	1.16e-55	1.75e-52
MYBL2	329.328	3.88778	0.248416	15.6503	3.31e-55	4.77e-52
BMP10	35.0633	-6.10431	0.393488	-15.5133	2.82e-54	3.89e-51
HIGD1B	31.7844	3.36096	0.216898	15.4956	3.71e-54	4.92e-51
UBE2T	193.725	3.0782	0.199135	15.4579	6.68e-54	8.52e-51
NUF2	119.543	3.88368	0.251478	15.4434	8.36e-54	1.03e-50
PLK1	234.649	3.34591	0.216864	15.4286	1.05e-53	1.24e-50
CDCA8	180.18	2.99511	0.194195	15.4232	1.14e-53	1.31e-50
CDC20	331.57	3.87998	0.25198	15.398	1.69e-53	1.87e-50
CDH13	288.22	2.63463	0.171256	15.3842	2.09e-53	2.24e-50
SPC24	244.888	3.31661	0.216764	15.3006	7.58e-53	7.85e-50
ZIC2	104.533	6.43816	0.423448	15.2041	3.32e-52	3.33e-49
DIPK2B	287.589	2.36932	0.157494	15.0438	3.79e-51	3.7e-48
CDCA3	132.925	2.81233	0.18723	15.0207	5.37e-51	5.09e-48
UBE2C	249.766	3.58475	0.238727	15.0161	5.76e-51	5.31e-48
FOXM1	353.246	3.43916	0.230622	14.9126	2.73e-50	2.45e-47
CCNB2	186.501	3.37728	0.226649	14.9009	3.25e-50	2.83e-47
APLN	236.976	4.1824	0.280746	14.8974	3.43e-50	2.91e-47
ESM1	272.723	4.31614	0.289889	14.889	3.89e-50	3.22e-47
NXPH4	126.14	5.55556	0.373913	14.8579	6.18e-50	5e-47
BUB1	170.712	3.37109	0.226983	14.8517	6.78e-50	5.35e-47
RASD2	44.8821	2.99375	0.201787	14.8362	8.54e-50	6.59e-47
FAM189B	842.214	1.67303	0.113648	14.7212	4.71e-49	3.55e-46
AURKB	136.37	2.97134	0.201966	14.7121	5.39e-49	3.97e-46
HJURP	154.315	3.62456	0.246747	14.6894	7.54e-49	5.43e-46
DLGAP5	117.259	3.44438	0.2346	14.6819	8.42e-49	5.94e-46
KIF18B	117.722	3.74057	0.255243	14.6549	1.25e-48	8.65e-46
OLFML2B	213.176	2.93659	0.200417	14.6524	1.3e-48	8.8e-46
ASS1P2	76.707	-4.88563	0.335065	-14.5811	3.7e-48	2.45e-45
MELK	144.615	3.64614	0.250537	14.5533	5.56e-48	3.62e-45
EZH2	274.104	2.20009	0.151697	14.5032	1.16e-47	7.37e-45
NEK2	171.2	3.82115	0.263911	14.479	1.65e-47	1.03e-44
ARHGEF39	103.965	2.63436	0.18226	14.4538	2.37e-47	1.46e-44
ASPM	461.538	3.74525	0.259555	14.4295	3.37e-47	2.03e-44
TGM3	570.559	5.67296	0.39329	14.4244	3.64e-47	2.15e-44
PKMYT1	128.886	2.96026	0.205255	14.4224	3.74e-47	2.18e-44
NOX4	39.8876	3.06546	0.21296	14.3945	5.6e-47	3.2e-44
TOP2A	880.391	3.72027	0.258791	14.3756	7.37e-47	4.14e-44
CENPL	107.4	2.30132	0.160685	14.3219	1.6e-46	8.82e-44
NDC80	153.589	3.01916	0.210883	14.3168	1.72e-46	9.34e-44
TRIP13	98.6698	2.9939	0.209742	14.2742	3.17e-46	1.69e-43
TOMM40L	1027.24	1.85112	0.129787	14.2628	3.73e-46	1.96e-43
CELSR3	148.87	3.34671	0.234806	14.2531	4.29e-46	2.22e-43
RACGAP1	348.255	2.27331	0.159574	14.2461	4.74e-46	2.42e-43
KIF20A	199.002	3.4487	0.242226	14.2375	5.36e-46	2.69e-43
GPC3	10442.5	5.36289	0.376725	14.2355	5.51e-46	2.73e-43
GNAZ	295.273	3.70383	0.260773	14.2033	8.74e-46	4.26e-43
CEP131	363.976	1.60743	0.113182	14.2021	8.89e-46	4.27e-43
HAGLR	89.2089	5.60818	0.395061	14.1958	9.73e-46	4.61e-43
SEMA5B	122.339	2.37229	0.168247	14.1	3.8e-45	1.75e-42
CDK1	296.207	3.22189	0.229453	14.0416	8.67e-45	3.88e-42
NCAPG	194.183	3.58734	0.256382	13.9922	1.74e-44	7.69e-42
FBXO43	25.2807	3.68372	0.264146	13.9458	3.34e-44	1.45e-41
CYP26A1	678.285	-5.06151	0.362953	-13.9453	3.36e-44	1.45e-41
GTSE1	94.2201	3.14335	0.225528	13.9377	3.74e-44	1.59e-41
WDR62	150.226	2.3011	0.165412	13.9114	5.4e-44	2.27e-41
EXO1	95.2321	3.38576	0.243912	13.8811	8.25e-44	3.42e-41
CENPM	129.846	3.18154	0.229533	13.8609	1.09e-43	4.47e-41
E2F1	467.893	3.60387	0.261382	13.7877	3.02e-43	1.22e-40
MXD3	202.724	2.28452	0.165848	13.7748	3.62e-43	1.44e-40
TRAIP	76.1336	2.46812	0.179301	13.7652	4.13e-43	1.63e-40
PLAC8	252.153	-3.19216	0.232062	-13.7556	4.71e-43	1.84e-40
ANLN	257.372	3.54495	0.258636	13.7063	9.3e-43	3.59e-40
NDUFA4L2	656.935	2.78013	0.203148	13.6853	1.24e-42	4.74e-40
B4GALNT1	194.222	4.33179	0.316929	13.668	1.58e-42	5.94e-40
COLEC10	707.507	-4.10989	0.301594	-13.6272	2.76e-42	1.03e-39
ERCC6L	33.1725	3.04584	0.223715	13.6148	3.27e-42	1.19e-39
MAPT	230.155	3.30935	0.243072	13.6147	3.27e-42	1.19e-39
CPLX2	1965.57	9.71565	0.713664	13.6138	3.32e-42	1.2e-39
HOXD9	61.6542	5.08219	0.375027	13.5515	7.76e-42	2.74e-39
CCNA2	432.487	4.01707	0.296559	13.5456	8.41e-42	2.93e-39
CSRNP1	3596.37	-2.22395	0.164243	-13.5406	9.01e-42	3.11e-39
KIF14	115.647	3.19671	0.236414	13.5216	1.17e-41	3.98e-39
MKI67	675.289	3.21164	0.238026	13.4928	1.72e-41	5.83e-39
AC008556.1	49.1792	-2.15179	0.159866	-13.46	2.69e-41	9.01e-39
KIF23	139.044	3.14841	0.234327	13.436	3.72e-41	1.23e-38
HMMR	204.631	3.20818	0.239697	13.3843	7.47e-41	2.43e-38
CENPE	112.136	2.96523	0.221549	13.3841	7.49e-41	2.43e-38
BCAN	111.78	5.19652	0.388413	13.3788	8.04e-41	2.59e-38
NT5DC2	572.661	2.41792	0.181112	13.3504	1.18e-40	3.76e-38
CAP2	839.549	2.35742	0.176873	13.3283	1.58e-40	5e-38
HOXA13	125.684	6.79339	0.509864	13.3239	1.68e-40	5.26e-38
NCAPH	132.592	2.88725	0.216823	13.3161	1.86e-40	5.78e-38
DSCC1	95.9951	1.94025	0.145867	13.3015	2.27e-40	6.96e-38
SKA3	83.5369	3.27269	0.246096	13.2984	2.36e-40	7.19e-38
CDT1	243.476	3.08074	0.231701	13.2962	2.44e-40	7.34e-38
OLFML2A	288.36	2.48821	0.187557	13.2664	3.62e-40	1.08e-37
SPC25	70.062	3.00581	0.227462	13.2146	7.23e-40	2.14e-37
MSTO1	370.424	1.70558	0.12924	13.197	9.13e-40	2.68e-37
PLXDC1	175.794	2.84849	0.215882	13.1947	9.41e-40	2.74e-37
RASL12	92.0216	2.22112	0.168648	13.1702	1.3e-39	3.76e-37
CDKN2A	282.442	3.61349	0.274718	13.1534	1.63e-39	4.65e-37
FLVCR1	386.565	2.17225	0.165218	13.1478	1.75e-39	4.96e-37
SFTA1P	6.10316	5.32962	0.405846	13.1321	2.16e-39	6e-37
CKAP2L	118.964	3.26081	0.249092	13.0908	3.72e-39	1.03e-36
EME1	48.4693	3.00329	0.229492	13.0867	3.92e-39	1.07e-36
TTK	97.44	3.46982	0.265498	13.0691	4.95e-39	1.34e-36
BMPER	297.896	-4.27487	0.327958	-13.0348	7.76e-39	2.07e-36
BUB1B	120.377	3.22778	0.24796	13.0173	9.75e-39	2.59e-36
C20orf204	136.334	5.05381	0.388955	12.9933	1.34e-38	3.49e-36
SHCBP1	104.656	3.49964	0.269344	12.9932	1.34e-38	3.49e-36
AC134043.3	7.46856	3.60855	0.277952	12.9826	1.54e-38	3.98e-36
MESP2	28.5797	3.22693	0.248796	12.9702	1.81e-38	4.64e-36
DTL	257.583	3.22655	0.249608	12.9265	3.19e-38	8.14e-36
SGO1	65.717	2.91208	0.225671	12.9041	4.27e-38	1.08e-35
CENPI	46.2006	2.95981	0.229438	12.9002	4.49e-38	1.13e-35
DEPDC1	127.681	3.89206	0.302233	12.8777	6.01e-38	1.5e-35
AC092171.2	251.494	2.68525	0.208782	12.8615	7.41e-38	1.82e-35
RECQL4	417.491	2.24919	0.174931	12.8576	7.79e-38	1.9e-35
DIAPH3	78.9668	3.3124	0.257689	12.8542	8.14e-38	1.97e-35
NEIL3	40.4859	4.07082	0.316983	12.8424	9.49e-38	2.28e-35
MARCO	2481.05	-5.10686	0.397733	-12.8399	9.8e-38	2.34e-35
MDK	3482.05	3.61133	0.28136	12.8353	1.04e-37	2.46e-35
RRM2	620.48	2.90646	0.226485	12.8329	1.07e-37	2.52e-35
DUSP9	279.063	3.84721	0.299986	12.8246	1.19e-37	2.79e-35
RBMY2FP	5.41772	22.8385	1.78541	12.7917	1.82e-37	4.23e-35
KIF18A	53.1991	3.09054	0.241739	12.7846	2e-37	4.6e-35
OIT3	2609.56	-2.96085	0.231776	-12.7746	2.27e-37	5.2e-35
TBC1D16	1330.06	1.78737	0.140083	12.7594	2.76e-37	6.28e-35
CCNF	198.043	1.97765	0.15504	12.7557	2.9e-37	6.53e-35
MYO18B	96.66	7.48004	0.586542	12.7528	3.01e-37	6.74e-35
KIF15	73.4192	3.10111	0.24331	12.7455	3.3e-37	7.35e-35
AURKA	406.775	2.44481	0.191838	12.7442	3.36e-37	7.43e-35
ECM1	1646.39	-2.90264	0.227874	-12.7379	3.64e-37	7.99e-35
UCK2	960.337	1.77133	0.139253	12.7202	4.57e-37	9.96e-35
NOTCH3	1418.59	2.30796	0.182159	12.67	8.67e-37	1.88e-34
EDIL3	162.702	2.70578	0.213792	12.6562	1.03e-36	2.23e-34
MAGEA1	185.123	9.19548	0.726831	12.6515	1.1e-36	2.35e-34
GJC1	128.542	2.48069	0.19614	12.6475	1.15e-36	2.45e-34
C5orf34	36.5188	2.22436	0.175894	12.646	1.18e-36	2.49e-34
ARHGAP11A	188.804	2.4057	0.190759	12.6112	1.83e-36	3.84e-34
PHACTR3	16.6471	-3.31184	0.262646	-12.6095	1.87e-36	3.9e-34
CDC6	263.687	2.92183	0.231825	12.6036	2.02e-36	4.18e-34
RFC4	389.882	1.53422	0.122377	12.5369	4.69e-36	9.6e-34
SGO2	103.413	2.28355	0.182252	12.5296	5.14e-36	1.05e-33
ASF1B	189.607	2.68925	0.214693	12.526	5.38e-36	1.09e-33
MMP11	390.044	3.65695	0.292043	12.522	5.66e-36	1.14e-33
FANCI	292.31	2.07058	0.165611	12.5027	7.22e-36	1.44e-33
TCF19	395.305	2.57865	0.206684	12.4763	1.01e-35	1.98e-33
SLC7A11	272.909	4.92383	0.395202	12.459	1.25e-35	2.43e-33
DBH	1049.22	-3.48642	0.279838	-12.4587	1.25e-35	2.43e-33
IGF2BP1	230.208	6.49136	0.521037	12.4585	1.26e-35	2.43e-33
S100P	1536.74	5.94111	0.476876	12.4584	1.26e-35	2.43e-33
FAM83D	364.777	2.66581	0.214203	12.4453	1.48e-35	2.84e-33
TICRR	45.364	3.21413	0.258316	12.4426	1.53e-35	2.92e-33
ROBO1	1781.54	2.98837	0.241926	12.3524	4.73e-35	8.85e-33
PARPBP	71.6017	2.4732	0.20026	12.35	4.87e-35	9.08e-33
TEDC2	109.906	2.6104	0.211437	12.346	5.12e-35	9.48e-33
ECT2	321.941	2.35571	0.191382	12.3089	8.11e-35	1.49e-32
TONSL	399.005	1.78968	0.145438	12.3055	8.46e-35	1.55e-32
JRK	223.802	1.5964	0.129946	12.2851	1.09e-34	1.98e-32
SLCO1C1	6.88286	4.17611	0.340064	12.2804	1.15e-34	2.09e-32
MUC13	5467.97	5.98491	0.488297	12.2567	1.55e-34	2.79e-32
CCNE1	110.57	3.2391	0.264574	12.2427	1.84e-34	3.29e-32
SPDL1	165.286	1.63532	0.133618	12.2388	1.93e-34	3.44e-32
OTX1	26.3387	4.23314	0.346227	12.2265	2.24e-34	3.98e-32
ANGPTL6	626.121	-2.70876	0.2216	-12.2237	2.32e-34	4.1e-32
CDKN2C	472.328	2.31596	0.190221	12.1751	4.22e-34	7.4e-32
COX4I2	59.3324	3.01033	0.247301	12.1727	4.34e-34	7.58e-32
ISX	170.886	7.23182	0.594357	12.1675	4.63e-34	8.04e-32
THY1	1420.09	2.71313	0.223252	12.1528	5.55e-34	9.58e-32
FSTL4	67.9798	4.77414	0.393289	12.139	6.56e-34	1.13e-31
SPP1	33033.5	5.36588	0.442087	12.1376	6.67e-34	1.14e-31
RCAN1	6543.48	-2.24359	0.184861	-12.1366	6.76e-34	1.15e-31
TACC3	618.205	1.77374	0.146227	12.13	7.32e-34	1.24e-31
ZFP41	288.731	1.94869	0.160775	12.1206	8.22e-34	1.38e-31
TRIM71	111.073	7.89666	0.65186	12.114	8.9e-34	1.49e-31
LINC01419	131.564	10.7951	0.891641	12.107	9.7e-34	1.62e-31
STMN1	1813.28	1.89712	0.156724	12.1049	9.95e-34	1.65e-31
LIFR	1914.02	-2.66563	0.220216	-12.1046	9.98e-34	1.65e-31
PBK	144.044	3.45019	0.285152	12.0995	1.06e-33	1.74e-31
MRAP2	123.369	4.52675	0.375461	12.0565	1.79e-33	2.93e-31
ECEL1	562.664	7.68533	0.639298	12.0215	2.74e-33	4.45e-31
TARBP1	739.521	1.51672	0.126378	12.0014	3.49e-33	5.65e-31
HOXD8	32.092	3.49758	0.291491	11.9989	3.6e-33	5.79e-31
GMNN	969.37	2.0766	0.173499	11.9689	5.17e-33	8.24e-31
LINC02241	49.3876	10.9247	0.914488	11.9462	6.8e-33	1.08e-30
STIL	114.573	2.38921	0.200043	11.9435	7.02e-33	1.11e-30
ST8SIA6-AS1	86.8368	5.67547	0.476048	11.9221	9.08e-33	1.43e-30
DDX11-AS1	8.42659	2.3515	0.197295	11.9187	9.46e-33	1.48e-30
C1RL	11049.6	-1.55299	0.130471	-11.9029	1.14e-32	1.78e-30
HAGLROS	4.05142	4.53112	0.380736	11.9009	1.17e-32	1.81e-30
UBE2S	374.113	1.67056	0.140413	11.8974	1.22e-32	1.88e-30
EPS8L3	477.531	5.15757	0.433699	11.8921	1.3e-32	2e-30
CFP	1044.33	-3.18369	0.267969	-11.8808	1.49e-32	2.27e-30
CDC45	124.681	2.82277	0.237598	11.8804	1.5e-32	2.27e-30
PTH1R	701.065	-2.89136	0.243415	-11.8783	1.53e-32	2.32e-30
GLDN	167.308	4.40892	0.3716	11.8647	1.81e-32	2.72e-30
MTX1P1	66.1478	2.11151	0.178149	11.8525	2.09e-32	3.13e-30
RNASEH2A	496.408	1.66332	0.140654	11.8256	2.88e-32	4.3e-30
NQO1	5833.65	5.27109	0.448496	11.7528	6.83e-32	1.01e-29
SEZ6L2	1382.93	4.14426	0.35279	11.7471	7.31e-32	1.08e-29
FATE1	11.5753	4.73607	0.403196	11.7463	7.37e-32	1.08e-29
UHRF1	130.843	3.05617	0.260391	11.7368	8.25e-32	1.21e-29
NTF3	153.735	-3.27445	0.279064	-11.7337	8.57e-32	1.25e-29
PCLAF	200.172	2.21572	0.188923	11.7282	9.14e-32	1.31e-29
RAD54L	52.5987	3.21704	0.274458	11.7214	9.9e-32	1.41e-29
E2F2	58.7246	2.80526	0.239605	11.7079	1.16e-31	1.65e-29
SOCS2	1884.03	-2.48636	0.212869	-11.6803	1.61e-31	2.27e-29
CBX2	125.559	2.62149	0.224512	11.6764	1.68e-31	2.36e-29
XRCC2	53.7707	2.7426	0.235251	11.6582	2.08e-31	2.92e-29
PRR11	132.568	2.24262	0.19243	11.6542	2.18e-31	3.04e-29
AC107396.1	14.2186	-4.70221	0.404442	-11.6264	3.03e-31	4.17e-29
TIGD5	393.93	1.5899	0.13675	11.6263	3.03e-31	4.17e-29
E2F8	69.4341	3.47316	0.299141	11.6104	3.65e-31	4.98e-29
EBF1	100.264	2.1134	0.182037	11.6097	3.68e-31	5e-29
SPOCK1	146.363	4.92736	0.42471	11.6017	4.04e-31	5.47e-29
ORC1	94.3459	2.90133	0.250358	11.5887	4.7e-31	6.33e-29
PXDNL	19.1271	3.18293	0.274985	11.5749	5.52e-31	7.41e-29
GINS1	186.727	2.48259	0.214616	11.5676	6.02e-31	8.04e-29
MAD2L1	212.07	2.16006	0.187089	11.5456	7.77e-31	1.03e-28
CRNDE	78.3141	3.3005	0.285985	11.5408	8.21e-31	1.09e-28
BCO2	1266.75	-3.27904	0.284168	-11.5391	8.38e-31	1.11e-28
NETO2	86.4993	2.38135	0.206501	11.5319	9.11e-31	1.2e-28
KIF11	196.477	2.02945	0.176129	11.5225	1.02e-30	1.33e-28
CENPW	118.827	2.13487	0.185446	11.5121	1.15e-30	1.49e-28
CSPG4	346.973	2.31521	0.201122	11.5115	1.15e-30	1.5e-28
DNAJC6	148.509	2.89168	0.251241	11.5096	1.18e-30	1.52e-28
DYNC1I1	188.132	4.27835	0.371762	11.5083	1.2e-30	1.54e-28
HOTTIP	27.129	7.03715	0.611516	11.5077	1.21e-30	1.54e-28
NMRAL2P	114.069	5.8731	0.510362	11.5077	1.21e-30	1.54e-28
CEP55	73.8313	2.61345	0.227578	11.4837	1.59e-30	2.01e-28
LYPD1	288.712	4.96397	0.432308	11.4825	1.62e-30	2.03e-28
MAFG-DT	78.6155	3.27648	0.285409	11.4799	1.66e-30	2.08e-28
FOSB	4623.54	-3.61827	0.316161	-11.4444	2.51e-30	3.13e-28
AC010776.2	4.49004	-3.99439	0.349282	-11.436	2.76e-30	3.43e-28
LILRA2	98.5701	-2.01809	0.176625	-11.4258	3.11e-30	3.84e-28
COL4A1	6895.81	2.06082	0.180423	11.4222	3.24e-30	3.99e-28
SIX1	26.1203	4.89582	0.428675	11.4208	3.29e-30	4.04e-28
RASGRF2	206.823	2.13271	0.186942	11.4084	3.8e-30	4.63e-28
PTP4A3	854.21	2.82765	0.247932	11.4049	3.95e-30	4.8e-28
FANCD2	186.285	2.11883	0.186016	11.3906	4.66e-30	5.64e-28
SPARCL1	4801.48	3.08729	0.271144	11.3862	4.9e-30	5.91e-28
AC104809.2	42.1282	-3.21728	0.282915	-11.3719	5.77e-30	6.91e-28
HIST2H2BC	158.937	2.19142	0.192761	11.3686	6e-30	7.15e-28
ZWINT	372.064	2.2129	0.194677	11.367	6.1e-30	7.25e-28
AL391845.2	4.47616	4.26263	0.375042	11.3657	6.19e-30	7.33e-28
THEM5	112.736	2.02805	0.178727	11.3472	7.66e-30	8.97e-28
CENPH	107.873	1.66476	0.146896	11.3328	9.02e-30	1.05e-27
TMEM145	23.0521	3.82562	0.337899	11.3218	1.02e-29	1.19e-27
KCNN2	475.37	-3.69819	0.327458	-11.2936	1.41e-29	1.62e-27
AFAP1-AS1	49.2877	5.40532	0.479098	11.2823	1.61e-29	1.83e-27
RAD51	73.4269	2.08299	0.18482	11.2704	1.84e-29	2.09e-27
RD3L	5.76745	-4.81316	0.427283	-11.2646	1.96e-29	2.23e-27
TK1	797.103	2.08365	0.185008	11.2625	2.01e-29	2.27e-27
CABYR	219.665	4.7407	0.421137	11.2569	2.14e-29	2.42e-27
N4BP2L1	1742.79	-1.6221	0.144356	-11.2368	2.69e-29	3.02e-27
ENAH	2155.86	1.58022	0.14071	11.2303	2.89e-29	3.23e-27
E2F7	41.6862	3.36137	0.299974	11.2055	3.83e-29	4.25e-27
FOXS1	59.1763	2.80505	0.25092	11.1791	5.16e-29	5.7e-27
MTHFD2L	546.754	-1.67323	0.149719	-11.1758	5.36e-29	5.9e-27
WDR76	159.507	2.1235	0.190038	11.1741	5.46e-29	6e-27
HDAC11	640.609	1.69646	0.151985	11.162	6.26e-29	6.85e-27
PRIMA1	15.3985	-3.91218	0.350557	-11.1599	6.41e-29	6.99e-27
SIX2	15.6473	5.70087	0.511137	11.1533	6.9e-29	7.5e-27
CDCA2	50.4286	2.9736	0.266632	11.1525	6.97e-29	7.55e-27
TNFRSF4	96.4257	2.36145	0.211876	11.1454	7.54e-29	8.11e-27
RAB3B	460.106	4.31762	0.387422	11.1445	7.62e-29	8.17e-27
DEPDC1B	107.593	2.8997	0.260252	11.1419	7.84e-29	8.39e-27
MCM2	783.515	2.26632	0.203427	11.1407	7.95e-29	8.47e-27
FOXO1	2416.25	-1.81319	0.162768	-11.1397	8.04e-29	8.54e-27
TERT	21.0705	6.09199	0.547052	11.136	8.38e-29	8.87e-27
MCM6	835.075	1.68582	0.151447	11.1314	8.83e-29	9.32e-27
OR51E1	14.3883	3.14478	0.28292	11.1154	1.06e-28	1.11e-26
COCH	125.544	4.33053	0.390175	11.0989	1.27e-28	1.32e-26
CCDC34	345.681	1.81141	0.16343	11.0837	1.51e-28	1.56e-26
CXCL12	6857.95	-2.66464	0.240497	-11.0797	1.57e-28	1.63e-26
GPR158	92.4534	3.66878	0.331235	11.0761	1.64e-28	1.69e-26
CRHBP	1965.21	-4.09284	0.369695	-11.0708	1.74e-28	1.78e-26
GPR182	171.809	-3.52445	0.318524	-11.0649	1.86e-28	1.89e-26
COL6A6	51.3093	-3.15067	0.285231	-11.046	2.29e-28	2.33e-26
CLEC4G	1818.12	-4.69085	0.425212	-11.0318	2.68e-28	2.72e-26
IQGAP3	384.418	3.30793	0.300028	11.0254	2.88e-28	2.91e-26
NDST3	39.2812	-4.29714	0.389839	-11.0229	2.97e-28	2.98e-26
IGF2BP3	67.3119	4.47861	0.406511	11.0172	3.16e-28	3.15e-26
TP73	79.3503	3.47133	0.315135	11.0154	3.22e-28	3.21e-26
EMC3-AS1	24.6938	2.09599	0.190315	11.0132	3.3e-28	3.28e-26
VIPR1	826.519	-3.10381	0.282053	-11.0044	3.64e-28	3.6e-26
ACADS	8581.54	-1.7239	0.156864	-10.9898	4.28e-28	4.22e-26
CHAF1B	142.131	2.37391	0.216029	10.9888	4.32e-28	4.25e-26
DACH1	76.9142	-2.347	0.213765	-10.9793	4.81e-28	4.7e-26
STRIP2	61.7378	2.74955	0.250659	10.9693	5.37e-28	5.24e-26
TRIM45	94.8438	2.12364	0.193684	10.9645	5.66e-28	5.49e-26
HOXA10	46.4208	5.31492	0.485457	10.9483	6.77e-28	6.54e-26
POLQ	58.2681	2.73068	0.249648	10.9381	7.58e-28	7.3e-26
NUSAP1	529.262	2.10246	0.192226	10.9375	7.63e-28	7.33e-26
CSMD2	45.3915	3.32594	0.304181	10.9341	7.92e-28	7.57e-26
EFNA4	294.683	1.58015	0.144517	10.934	7.93e-28	7.57e-26
WDHD1	105.241	1.83517	0.16788	10.9315	8.15e-28	7.77e-26
HCN2	53.732	3.59439	0.32909	10.9222	9.03e-28	8.55e-26
MTBP	63.8796	1.69673	0.155614	10.9034	1.11e-27	1.05e-25
TTC39A	322.343	3.32935	0.305992	10.8805	1.43e-27	1.34e-25
MND1	62.5672	2.91657	0.268101	10.8786	1.46e-27	1.36e-25
COX6B1P4	12.7899	-3.10772	0.285883	-10.8706	1.59e-27	1.48e-25
IRF8	1251.42	-1.693	0.155744	-10.8704	1.6e-27	1.48e-25
IGSF3	440.956	2.81194	0.25884	10.8636	1.72e-27	1.59e-25
ZNF517	436.514	1.66947	0.153912	10.8469	2.06e-27	1.89e-25
AC004477.1	11.2691	2.31437	0.213765	10.8267	2.57e-27	2.32e-25
LRRC4	62.5705	-2.09562	0.193657	-10.8213	2.73e-27	2.45e-25
LY6H	14.8379	4.38087	0.405112	10.814	2.96e-27	2.64e-25
MCM10	80.3184	2.82482	0.261235	10.8133	2.98e-27	2.65e-25
TEX26	6.48096	-4.11086	0.380193	-10.8125	3e-27	2.67e-25
CPEB3	1385.37	-1.96723	0.182244	-10.7945	3.66e-27	3.22e-25
PIF1	54.8227	2.33931	0.216936	10.7834	4.12e-27	3.63e-25
TRIB1	9995.14	-1.88813	0.17513	-10.7813	4.22e-27	3.7e-25
PMP2	3.32052	-4.53756	0.420942	-10.7795	4.3e-27	3.76e-25
HGF	925.135	-2.56447	0.238327	-10.7603	5.3e-27	4.62e-25
MESP1	75.5375	1.91197	0.177691	10.7601	5.31e-27	4.62e-25
ID2	11143.8	-1.61397	0.150031	-10.7575	5.46e-27	4.74e-25
COL4A2	8102.64	1.96831	0.183541	10.7241	7.85e-27	6.76e-25
FENDRR	29.0322	-2.88758	0.26929	-10.7229	7.94e-27	6.82e-25
TCTEX1D1	107.257	-3.21336	0.299814	-10.7178	8.39e-27	7.19e-25
CENPK	57.4515	2.39581	0.223829	10.7038	9.77e-27	8.33e-25
LINC02475	13.7767	6.40632	0.598528	10.7035	9.8e-27	8.33e-25
NKD1	1101.14	4.32241	0.404128	10.6956	1.07e-26	9.02e-25
LAMA4	813.751	1.71923	0.160908	10.6845	1.2e-26	1.01e-24
CENPU	283.46	2.37168	0.221998	10.6834	1.22e-26	1.02e-24
FCN3	3821.52	-3.61154	0.33863	-10.6651	1.48e-26	1.23e-24
RGS5	3528.9	1.76813	0.165928	10.656	1.63e-26	1.36e-24
RNF152	2859.83	-1.89788	0.178199	-10.6504	1.74e-26	1.44e-24
PRKAR2B	134.896	-2.26742	0.21306	-10.6422	1.9e-26	1.56e-24
ALKAL1	8.3145	-3.40488	0.320056	-10.6384	1.98e-26	1.63e-24
GABRQ	8.44366	4.6089	0.433269	10.6375	1.99e-26	1.64e-24
TCIM	4328.82	-2.26396	0.212864	-10.6357	2.03e-26	1.66e-24
CSMD1	65.3577	6.71795	0.631833	10.6325	2.1e-26	1.72e-24
DUXAP8	47.7892	3.47211	0.326582	10.6317	2.12e-26	1.72e-24
CTHRC1	91.0293	2.92567	0.275368	10.6246	2.29e-26	1.85e-24
CCL23	55.5762	-2.62319	0.246922	-10.6236	2.32e-26	1.87e-24
TM4SF20	110.081	6.86014	0.646886	10.6049	2.83e-26	2.26e-24
SPATC1L	135.67	2.85318	0.269128	10.6016	2.93e-26	2.33e-24
PYGB	2542.22	1.58387	0.149556	10.5905	3.3e-26	2.62e-24
SNCG	642.56	3.56361	0.336519	10.5896	3.33e-26	2.64e-24
MAGEC2	259.6	9.17267	0.866302	10.5883	3.38e-26	2.67e-24
OTUB2	83.6634	1.87054	0.176935	10.5719	4.02e-26	3.17e-24
STAB2	805.067	-4.0735	0.385343	-10.5711	4.06e-26	3.19e-24
TOB2P1	17.3763	2.63611	0.249678	10.558	4.66e-26	3.66e-24
ORC6	63.2087	2.48427	0.235318	10.5571	4.71e-26	3.68e-24
ASB16	26.3739	2.25243	0.213414	10.5543	4.85e-26	3.79e-24
MAGEB17	28.0263	6.33473	0.600254	10.5534	4.9e-26	3.81e-24
LRAT	315.665	-2.68895	0.254839	-10.5516	4.99e-26	3.88e-24
SIGLEC7	120.446	-2.08605	0.197708	-10.5512	5.02e-26	3.89e-24
C21orf91	539.659	-1.63497	0.15497	-10.5503	5.06e-26	3.91e-24
PAQR4	185.741	1.93724	0.183775	10.5413	5.57e-26	4.28e-24
GPAA1	7768.41	1.61041	0.152873	10.5343	6e-26	4.61e-24
SEPTIN3	33.8541	3.00793	0.285792	10.5249	6.63e-26	5.08e-24
SCN4A	56.7639	2.377	0.226071	10.5144	7.42e-26	5.67e-24
TPX2	702.923	1.93705	0.184277	10.5116	7.64e-26	5.82e-24
BMS1P8	77.4646	5.96533	0.567517	10.5113	7.66e-26	5.83e-24
FBXL18	113.578	1.57098	0.149526	10.5064	8.07e-26	6.11e-24
TRIM16	510.357	3.22028	0.306738	10.4984	8.78e-26	6.63e-24
AL606489.1	9.70664	3.34654	0.318957	10.4921	9.39e-26	7.07e-24
COL9A1	11.7194	3.55802	0.33926	10.4876	9.85e-26	7.41e-24
KIF19	48.3167	-2.56369	0.244494	-10.4857	1.01e-25	7.54e-24
AKR1C3	11243.2	1.6897	0.161348	10.4724	1.16e-25	8.64e-24
DCAF4L2	294.141	10.0321	0.958132	10.4705	1.18e-25	8.79e-24
C1QL1	170.886	3.70223	0.353838	10.4631	1.28e-25	9.47e-24
IGFBP3	18112.9	-1.93524	0.185013	-10.46	1.32e-25	9.76e-24
IQCD	44.2147	3.04631	0.291451	10.4522	1.43e-25	1.06e-23
FEZF1-AS1	30.0012	5.91281	0.565718	10.4519	1.44e-25	1.06e-23
C2CD4D-AS1	76.9793	1.82535	0.174715	10.4476	1.5e-25	1.1e-23
C17orf82	15.1349	2.9914	0.286376	10.4457	1.53e-25	1.12e-23
MTFR2	30.01	2.62574	0.251468	10.4417	1.6e-25	1.17e-23
NFIL3	3259.19	-1.65554	0.158686	-10.4328	1.76e-25	1.28e-23
C21orf58	84.6581	1.93766	0.18574	10.4321	1.77e-25	1.28e-23
LCAT	7244.43	-2.59571	0.249213	-10.4156	2.1e-25	1.52e-23
PELI2	139.719	-1.89388	0.181858	-10.414	2.14e-25	1.55e-23
MYLK-AS1	13.9921	1.80039	0.172948	10.41	2.23e-25	1.61e-23
CHEK1	205.718	1.50659	0.14485	10.401	2.45e-25	1.76e-23
LYPD8	38.6869	5.3439	0.514307	10.3905	2.74e-25	1.97e-23
CRIP3	244.245	2.41896	0.232858	10.3881	2.81e-25	2.01e-23
MPC1	6166.73	-1.51585	0.145993	-10.3831	2.96e-25	2.11e-23
RIPOR3	285.98	-2.5107	0.241923	-10.3781	3.12e-25	2.22e-23
CDKN2B-AS1	13.7995	3.15028	0.303651	10.3747	3.23e-25	2.3e-23
CDH24	79.3149	1.99198	0.192175	10.3654	3.56e-25	2.52e-23
RNFT2	38.2782	2.2766	0.219717	10.3615	3.71e-25	2.62e-23
CSPG5	39.2694	2.58043	0.249168	10.3562	3.92e-25	2.76e-23
EHD3	637.204	-2.03205	0.196223	-10.3558	3.94e-25	2.77e-23
G6PD	915.649	2.29002	0.221501	10.3387	4.71e-25	3.3e-23
ADGRG7	550.426	-2.70119	0.261426	-10.3325	5.02e-25	3.51e-23
MAPK8IP2	202.848	2.93696	0.284407	10.3266	5.34e-25	3.71e-23
FAM133A	98.8298	5.75267	0.557157	10.325	5.43e-25	3.77e-23
CD200	97.4403	2.03258	0.196937	10.321	5.66e-25	3.9e-23
RND3	4759.91	-2.22934	0.21611	-10.3158	5.98e-25	4.11e-23
AC087392.1	76.866	-3.72199	0.360882	-10.3136	6.12e-25	4.2e-23
APOF	11664.9	-3.16368	0.307617	-10.2845	8.28e-25	5.61e-23
AJM1	135.694	1.76608	0.171775	10.2814	8.55e-25	5.79e-23
COL2A1	67.8906	6.46438	0.628963	10.2778	8.87e-25	5.99e-23
KCNMB2-AS1	20.4967	4.36544	0.425012	10.2713	9.49e-25	6.39e-23
CYP17A1	2075.29	4.45096	0.433356	10.2709	9.53e-25	6.41e-23
CCDC28B	171.384	2.58156	0.251382	10.2695	9.67e-25	6.49e-23
LINC01234	78.1704	6.78752	0.661369	10.2628	1.04e-24	6.94e-23
KDM8	2543.79	-2.44226	0.238007	-10.2613	1.05e-24	7.04e-23
PCSK2	6.85848	-4.27373	0.416593	-10.2588	1.08e-24	7.19e-23
KCTD9P4	13.5639	-3.18131	0.31043	-10.2481	1.21e-24	8.02e-23
TRPC6	22.2966	1.98872	0.194387	10.2307	1.44e-24	9.58e-23
RBP7	349.651	2.17595	0.212799	10.2254	1.53e-24	1.01e-22
TMEM26	81.1095	-2.08985	0.204415	-10.2235	1.56e-24	1.03e-22
LAMC1	4778.68	1.60812	0.157366	10.2189	1.63e-24	1.08e-22
TMC7	56.4488	2.0171	0.197421	10.2173	1.66e-24	1.09e-22
PTP4A2P2	3.90532	3.12063	0.30558	10.2121	1.75e-24	1.15e-22
CTAG2	77.0375	10.7107	1.04902	10.2102	1.79e-24	1.17e-22
LINGO1	226.446	2.78132	0.272481	10.2074	1.84e-24	1.2e-22
TIMD4	194.588	-3.64601	0.357346	-10.203	1.92e-24	1.25e-22
RBM24	166.082	2.69067	0.26373	10.2024	1.94e-24	1.26e-22
PAMR1	354.72	-2.03695	0.199823	-10.1938	2.11e-24	1.37e-22
GLI4	448.895	1.60783	0.157976	10.1776	2.5e-24	1.6e-22
DNASE1L3	3022.31	-2.73363	0.268657	-10.1752	2.56e-24	1.64e-22
LINC01287	304.97	9.35875	0.920295	10.1693	2.72e-24	1.73e-22
FIBCD1	11.986	5.71314	0.562255	10.1611	2.96e-24	1.87e-22
LINC02806	32.61	7.82945	0.771136	10.1531	3.21e-24	2.03e-22
AC079061.1	112.974	-3.17787	0.313035	-10.1518	3.25e-24	2.05e-22
DSE	495.357	-1.53362	0.151071	-10.1516	3.26e-24	2.05e-22
GNG4	329.626	5.81826	0.573361	10.1476	3.39e-24	2.12e-22
RNF157	472.378	2.67092	0.263379	10.141	3.63e-24	2.26e-22
EGFL6	10.0046	4.42928	0.436771	10.1409	3.64e-24	2.26e-22
ZFPM2-AS1	72.0897	4.14192	0.408443	10.1408	3.64e-24	2.26e-22
KIF24	58.4774	1.73458	0.171658	10.1049	5.26e-24	3.24e-22
RFPL4AP6	2.56509	-4.38162	0.433705	-10.1028	5.37e-24	3.31e-22
IL1RAP	3214.93	-2.14429	0.21241	-10.095	5.81e-24	3.56e-22
HHIPL2	58.7008	5.5481	0.549669	10.0935	5.9e-24	3.6e-22
HMGCLL1	18.2832	-2.82966	0.280418	-10.0909	6.06e-24	3.69e-22
PITX1	122.913	5.73996	0.569018	10.0875	6.28e-24	3.82e-22
FCN2	1561.5	-4.03466	0.400152	-10.0828	6.58e-24	4e-22
GPRIN1	103.505	2.6352	0.261528	10.0762	7.04e-24	4.26e-22
TCF15	21.8234	2.59348	0.257395	10.0758	7.07e-24	4.27e-22
RAD51AP1	95.9019	2.15964	0.214475	10.0694	7.54e-24	4.54e-22
RXFP1	34.4114	-1.87572	0.186391	-10.0633	8.02e-24	4.82e-22
JCAD	656.056	1.83419	0.182317	10.0605	8.26e-24	4.94e-22
LHX4	19.4778	2.26984	0.225787	10.053	8.91e-24	5.32e-22
STARD5	379.548	-1.72669	0.171781	-10.0517	9.03e-24	5.38e-22
FAM72D	7.37682	3.26633	0.326558	10.0023	1.49e-23	8.83e-22
OSR2	45.6774	4.49616	0.449886	9.994	1.62e-23	9.55e-22
SEMA4F	174.894	1.57596	0.157701	9.99338	1.63e-23	9.59e-22
HASPIN	17.931	2.56471	0.256743	9.98943	1.7e-23	9.97e-22
FANCE	99.367	1.50874	0.151052	9.98823	1.72e-23	1.01e-21
HCG25	16.0725	1.77573	0.177883	9.9826	1.82e-23	1.06e-21
KCNK9	23.2241	6.27092	0.628298	9.98081	1.85e-23	1.08e-21
LINC00853	45.4077	2.73856	0.274477	9.97736	1.91e-23	1.11e-21
EFNB3	69.3928	-2.26205	0.226951	-9.96715	2.12e-23	1.23e-21
ALG1L	153.381	3.26106	0.327274	9.96431	2.18e-23	1.26e-21
DNER	61.9631	6.71847	0.674256	9.96427	2.18e-23	1.26e-21
EMX1	45.1124	3.97229	0.398838	9.95967	2.29e-23	1.32e-21
LOXL2	435.386	1.66542	0.167413	9.94803	2.57e-23	1.48e-21
CAMK4	103.889	-1.92276	0.193336	-9.94522	2.65e-23	1.52e-21
OLFML3	736.319	-2.00013	0.201203	-9.94088	2.76e-23	1.59e-21
PLSCR4	1787.62	-1.63895	0.165108	-9.92651	3.19e-23	1.83e-21
C1R	105725	-1.63049	0.164517	-9.91074	3.74e-23	2.13e-21
PODXL	1176.58	1.68112	0.169634	9.9103	3.76e-23	2.14e-21
SOGA1	507.276	1.52191	0.153621	9.90696	3.88e-23	2.2e-21
BAIAP2L2	302.926	2.87176	0.289968	9.90371	4.01e-23	2.26e-21
CD109	371.243	2.59857	0.262506	9.89907	4.2e-23	2.36e-21
GDF2	436.361	-5.22885	0.528291	-9.89768	4.26e-23	2.39e-21
TUBE1	927.681	-1.69027	0.170859	-9.89275	4.48e-23	2.5e-21
SSUH2	137.796	3.92377	0.396637	9.89262	4.48e-23	2.5e-21
FOS	14066.8	-2.89071	0.292212	-9.8925	4.49e-23	2.5e-21
ADRA2C	150.186	3.405	0.344395	9.8869	4.74e-23	2.63e-21
BRSK2	32.3214	3.79243	0.38365	9.88513	4.83e-23	2.67e-21
CXCL14	1046.51	-3.99287	0.404033	-9.88253	4.96e-23	2.74e-21
SLC39A14	27197.1	-1.56008	0.157876	-9.88165	5e-23	2.76e-21
LEF1	173.087	3.02839	0.306554	9.8788	5.14e-23	2.83e-21
ADRA2B	233.676	-1.99301	0.201761	-9.87811	5.18e-23	2.84e-21
UGT2B11	884.596	3.44739	0.349091	9.87531	5.33e-23	2.92e-21
GBAP1	44.4416	1.52092	0.154178	9.86472	5.92e-23	3.23e-21
ELFN2	199.71	3.9901	0.404551	9.86305	6.02e-23	3.28e-21
GSTZ1	4362.62	-1.95533	0.198331	-9.85892	6.27e-23	3.41e-21
PROM2	42.5177	-2.47855	0.251573	-9.85218	6.71e-23	3.63e-21
CLSPN	43.751	2.7246	0.276648	9.84862	6.95e-23	3.75e-21
SSX1	241.867	9.14503	0.928581	9.84839	6.97e-23	3.75e-21
AP000769.1	59.8302	2.86027	0.290528	9.84509	7.2e-23	3.87e-21
LINC01532	10.3023	6.22158	0.632002	9.84423	7.26e-23	3.9e-21
AL445524.1	322.51	2.02521	0.205736	9.84372	7.3e-23	3.91e-21
AC078993.1	39.2578	5.21808	0.530233	9.84111	7.49e-23	4e-21
SLC6A8	963.289	3.29453	0.335046	9.83305	8.11e-23	4.32e-21
C1QTNF3	444.576	3.52298	0.358398	9.82981	8.38e-23	4.45e-21
PAFAH1B3	438.099	1.7323	0.176549	9.81202	9.99e-23	5.28e-21
GPM6A	275.37	-2.9606	0.301773	-9.81069	1.01e-22	5.35e-21
PLK4	69.6835	2.07136	0.211289	9.80342	1.09e-22	5.72e-21
DUXAP9	8.15882	4.00975	0.409215	9.79864	1.14e-22	5.99e-21
LINC00665	204.084	2.70812	0.27645	9.79604	1.17e-22	6.13e-21
ERFE	30.6859	2.34616	0.239553	9.79391	1.2e-22	6.25e-21
DGKI	16.1588	2.56633	0.262416	9.77962	1.38e-22	7.12e-21
AC007842.1	14.4023	1.94982	0.199557	9.77073	1.5e-22	7.76e-21
LCN2	3476.64	4.05746	0.415414	9.76727	1.56e-22	8.02e-21
NUDT17	49.2043	1.74536	0.178719	9.76594	1.58e-22	8.12e-21
TRIM54	58.4454	4.95519	0.507913	9.75599	1.74e-22	8.91e-21
CROCC2	19.9688	-2.54523	0.261119	-9.74737	1.89e-22	9.65e-21
B4GALNT2	90.6992	7.23238	0.742858	9.73589	2.12e-22	1.08e-20
NPY1R	342.935	-2.28706	0.234953	-9.73413	2.16e-22	1.09e-20
AC109322.1	50.047	1.93878	0.199275	9.72914	2.27e-22	1.15e-20
MS4A6A	1898.28	-1.82895	0.188075	-9.72458	2.37e-22	1.2e-20
BOP1	2421.59	1.66678	0.171421	9.72332	2.4e-22	1.21e-20
2021-03-04	5.35842	4.08663	0.420816	9.71121	2.7e-22	1.36e-20
ITGA6	2145.71	1.63253	0.168233	9.70399	2.9e-22	1.45e-20
ETS2	15182.4	-1.6498	0.170191	-9.69377	3.2e-22	1.6e-20
TPTEP1	19.2483	-2.09942	0.216718	-9.68733	3.41e-22	1.7e-20
STXBP6	346.144	1.66098	0.171484	9.6859	3.46e-22	1.72e-20
LRRN3	40.7956	-2.63659	0.272212	-9.68581	3.46e-22	1.72e-20
OIP5	49.2926	2.03298	0.209958	9.68279	3.57e-22	1.77e-20
JAG2	371.38	1.84132	0.190203	9.68083	3.64e-22	1.8e-20
REG3A	903.277	8.74189	0.903298	9.67775	3.75e-22	1.85e-20
ITPKA	182.774	2.25652	0.233199	9.67637	3.8e-22	1.88e-20
MT1CP	15.1569	-3.37605	0.348939	-9.67519	3.84e-22	1.9e-20
LINC00511	126.803	3.66875	0.379403	9.66979	4.05e-22	1.99e-20
CIP2A	82.7599	2.0933	0.216598	9.66445	4.27e-22	2.09e-20
DIO2	74.7334	4.23881	0.438614	9.66411	4.28e-22	2.1e-20
PBLD	8143.62	-1.94617	0.201475	-9.65965	4.47e-22	2.18e-20
SFRP4	180.821	3.50822	0.363211	9.65889	4.51e-22	2.2e-20
AC079466.1	259.417	5.62259	0.582251	9.65665	4.61e-22	2.24e-20
HAGHL	80.8658	3.33533	0.345418	9.65592	4.64e-22	2.26e-20
CAPN11	16.791	2.11618	0.219166	9.65557	4.66e-22	2.26e-20
AC011294.1	18.1274	4.12543	0.427295	9.65475	4.69e-22	2.27e-20
FGF13	247.123	2.50148	0.259521	9.63882	5.48e-22	2.65e-20
AL121906.2	10.1482	2.66512	0.276681	9.63243	5.83e-22	2.81e-20
ASPHD1	292.065	3.57656	0.371711	9.62187	6.46e-22	3.11e-20
ZIC5	35.1951	6.33786	0.659138	9.61538	6.89e-22	3.3e-20
ZFP1	616.332	-1.54844	0.161224	-9.60427	7.67e-22	3.67e-20
GPSM2	146.453	1.61947	0.168653	9.60236	7.81e-22	3.73e-20
SLC38A2	17915.3	-1.62662	0.169663	-9.58735	9.04e-22	4.3e-20
AL023803.2	10.5139	3.46851	0.36186	9.58523	9.22e-22	4.39e-20
AL162431.1	19.9048	2.42208	0.252773	9.58206	9.51e-22	4.52e-20
C1orf61	35.5799	4.23071	0.44208	9.57001	1.07e-21	5.07e-20
CASTOR2	36.2725	2.0567	0.21504	9.56429	1.13e-21	5.33e-20
RDM1	16.9287	3.14799	0.329361	9.55785	1.2e-21	5.66e-20
FAM222A	422.21	1.77909	0.186186	9.55547	1.23e-21	5.78e-20
GRAMD1A	1407.91	1.51895	0.15899	9.55378	1.25e-21	5.87e-20
SNX25P1	11.2762	1.99095	0.2085	9.5489	1.31e-21	6.14e-20
C6orf223	187.502	4.89653	0.51285	9.54769	1.33e-21	6.2e-20
CCBE1	256.422	-3.35541	0.351547	-9.54469	1.37e-21	6.37e-20
SLC22A31	501.021	5.62814	0.590381	9.53306	1.53e-21	7.12e-20
MAGEA12	125.801	8.0016	0.840936	9.51511	1.82e-21	8.37e-20
CA4	50.0817	3.79291	0.399022	9.50551	1.99e-21	9.17e-20
HHIP-AS1	28.4351	-2.51796	0.264931	-9.5042	2.02e-21	9.27e-20
HIST1H4H	31.8805	2.67695	0.281875	9.49694	2.16e-21	9.91e-20
PPP2R2C	180.307	5.81513	0.612569	9.49302	2.24e-21	1.03e-19
TBX4	31.4089	7.31214	0.770518	9.4899	2.31e-21	1.06e-19
CACNB4	31.2785	3.49417	0.368378	9.48529	2.42e-21	1.1e-19
COX7B2	144.135	9.50084	1.00239	9.47819	2.59e-21	1.18e-19
HELLS	151.825	1.99995	0.211046	9.4764	2.63e-21	1.2e-19
TLCD3B	5.8084	3.97555	0.420098	9.46341	2.98e-21	1.35e-19
ALPK3	531.466	2.23719	0.236793	9.44789	3.46e-21	1.57e-19
CENPO	192.673	1.62867	0.172389	9.44765	3.47e-21	1.57e-19
MAGEA6	191.452	8.2926	0.878038	9.44447	3.57e-21	1.61e-19
HAND2-AS1	111.933	-2.9107	0.308248	-9.44272	3.63e-21	1.64e-19
TP53I3	891.965	1.84054	0.194952	9.44101	3.69e-21	1.66e-19
MAPK12	301.204	2.26568	0.240073	9.43748	3.82e-21	1.72e-19
RCL1	2482.44	-1.63018	0.17285	-9.43122	4.05e-21	1.82e-19
PDGFA	664.598	1.96489	0.208345	9.43092	4.07e-21	1.82e-19
CARMIL3	100.374	-1.89138	0.200733	-9.42232	4.41e-21	1.97e-19
PRPF38AP1	3.7695	-4.32585	0.459267	-9.41903	4.55e-21	2.03e-19
MAFA	29.5153	5.53312	0.587696	9.41493	4.73e-21	2.1e-19
NMB	110.414	1.92958	0.205065	9.40959	4.98e-21	2.2e-19
SP6	24.9683	2.62171	0.278778	9.4043	5.24e-21	2.31e-19
UPK3A	131.47	5.01167	0.533087	9.40124	5.39e-21	2.37e-19
AC132192.2	18.9279	1.76564	0.187964	9.39351	5.8e-21	2.54e-19
CHML	397.756	1.79458	0.191151	9.38829	6.1e-21	2.67e-19
RNF212	9.79384	-2.26873	0.241787	-9.38319	6.4e-21	2.8e-19
SRRM3	81.4009	3.29913	0.351629	9.38241	6.45e-21	2.82e-19
DLG5-AS1	20.891	2.63901	0.281347	9.37992	6.6e-21	2.88e-19
LPL	98.6936	2.06942	0.220818	9.37165	7.14e-21	3.11e-19
STEAP3	9557.54	-1.74041	0.185793	-9.36746	7.43e-21	3.23e-19
AL109615.3	18.1951	3.25976	0.348201	9.36172	7.84e-21	3.4e-19
CTSV	48.9672	3.15967	0.337565	9.3602	7.96e-21	3.44e-19
SIX4	27.3021	3.15814	0.337428	9.35943	8.02e-21	3.47e-19
LILRA1	53.0533	-1.6721	0.178782	-9.35272	8.54e-21	3.69e-19
HSPB1	16723.8	1.74183	0.186317	9.34873	8.87e-21	3.81e-19
KIAA1522	2147.35	1.50431	0.160978	9.34481	9.21e-21	3.95e-19
BLM	69.2582	2.07715	0.222807	9.32263	1.13e-20	4.84e-19
BCL9	665.883	1.52589	0.163732	9.31945	1.17e-20	4.97e-19
AL365181.3	327.309	3.84471	0.412566	9.31902	1.17e-20	4.98e-19
COLCA2	64.8946	2.63798	0.283146	9.31668	1.2e-20	5.09e-19
PVT1	113.87	2.15205	0.231009	9.3159	1.21e-20	5.12e-19
SERPINI1	176.887	1.74845	0.187695	9.31537	1.22e-20	5.14e-19
MAGEA3	273.715	7.55847	0.811441	9.31488	1.22e-20	5.16e-19
CCDC163	74.9128	1.67149	0.179459	9.314	1.23e-20	5.19e-19
ZBTB12	72.4955	1.54593	0.166032	9.31104	1.27e-20	5.33e-19
SEPTIN5	213.378	1.96899	0.211937	9.29042	1.54e-20	6.44e-19
AC007906.2	49.6335	-2.29013	0.246516	-9.28996	1.54e-20	6.46e-19
CEACAM3	8.61468	-2.22004	0.23898	-9.28965	1.55e-20	6.47e-19
TMCO1-AS1	8.20484	2.12984	0.22933	9.28719	1.58e-20	6.61e-19
CBFA2T3	314.971	-1.90409	0.205106	-9.28343	1.64e-20	6.84e-19
SPINK5	43.8279	3.25048	0.35017	9.28258	1.65e-20	6.89e-19
LINC02202	5.20169	2.5475	0.274472	9.28145	1.67e-20	6.95e-19
LPA	3210.79	-2.58896	0.279487	-9.26323	1.98e-20	8.22e-19
LRRC37A6P	18.9881	3.11414	0.336526	9.25378	2.17e-20	8.95e-19
AL133367.1	16.6575	1.73253	0.187267	9.25163	2.21e-20	9.11e-19
MPZ	450.74	3.23793	0.350171	9.2467	2.32e-20	9.51e-19
DNM3	57.5244	1.88111	0.203442	9.2464	2.32e-20	9.53e-19
NANOS1	40.1759	2.69909	0.292049	9.24191	2.42e-20	9.92e-19
FOXD2	73.6037	2.24142	0.242673	9.23637	2.55e-20	1.04e-18
RAB11FIP4	974.496	1.68721	0.182685	9.2356	2.57e-20	1.05e-18
CCDC170	274.64	2.84299	0.308185	9.22495	2.84e-20	1.16e-18
SFN	776.278	3.86547	0.419218	9.22065	2.95e-20	1.2e-18
KNTC1	295.566	1.68784	0.183116	9.21731	3.05e-20	1.23e-18
MAMSTR	36.4481	1.97043	0.213847	9.21421	3.14e-20	1.26e-18
GNAO1	1017.37	-2.59042	0.281316	-9.20823	3.32e-20	1.33e-18
GNA14	183.779	-1.73564	0.188541	-9.20565	3.4e-20	1.36e-18
PRAME	159.177	6.41664	0.697062	9.20527	3.41e-20	1.37e-18
CD4	4835.33	-1.72953	0.187939	-9.20258	3.49e-20	1.4e-18
ACAN	45.1437	3.7228	0.404594	9.20133	3.54e-20	1.41e-18
SIGLEC9	121.804	-1.58979	0.172806	-9.19987	3.58e-20	1.43e-18
RAB6B	130.277	1.68085	0.18276	9.19706	3.68e-20	1.47e-18
NEB	697.143	3.36668	0.366188	9.19387	3.79e-20	1.51e-18
KIFC2	271.211	1.53312	0.16683	9.18975	3.94e-20	1.56e-18
CDC25A	92.3441	1.81419	0.197487	9.18638	4.06e-20	1.61e-18
ILDR2	275.693	2.93953	0.320104	9.18305	4.19e-20	1.66e-18
AL590666.2	47.5289	3.42703	0.373197	9.18289	4.2e-20	1.66e-18
BDKRB1	25.8016	3.11672	0.339408	9.1828	4.2e-20	1.66e-18
PDIA2	31.1003	4.75036	0.517417	9.18092	4.27e-20	1.69e-18
ACTN2	103.565	3.37335	0.367738	9.17325	4.59e-20	1.8e-18
FAM111B	200.229	2.73122	0.297826	9.17052	4.71e-20	1.85e-18
SIGLEC11	90.0806	-2.28598	0.249388	-9.16639	4.89e-20	1.92e-18
DUSP6	5826.53	-1.60133	0.174816	-9.16007	5.19e-20	2.02e-18
P4HA2	1106.18	1.56108	0.170441	9.15905	5.24e-20	2.04e-18
NPSR1-AS1	20.3791	6.29505	0.687592	9.15521	5.43e-20	2.11e-18
MSC	798.868	3.59561	0.392763	9.15466	5.45e-20	2.12e-18
CAMK2N2	70.1406	2.57341	0.28119	9.15187	5.6e-20	2.17e-18
RHBDL3	42.4261	3.93892	0.430434	9.15105	5.64e-20	2.18e-18
HSF2BP	11.4241	2.31562	0.253108	9.14874	5.76e-20	2.23e-18
MT1F	6430.43	-3.6499	0.398992	-9.1478	5.81e-20	2.24e-18
AC009005.1	25.7529	1.90953	0.208792	9.14562	5.93e-20	2.28e-18
NRG2	45.8892	2.74211	0.299875	9.14417	6.01e-20	2.31e-18
ODAM	180.217	7.99901	0.874882	9.14296	6.08e-20	2.33e-18
ZNF775	498.862	1.60018	0.175063	9.14056	6.21e-20	2.38e-18
ZNF99	17.8132	4.64277	0.508311	9.13371	6.62e-20	2.53e-18
PGC	56.2676	6.12839	0.671465	9.1269	7.05e-20	2.69e-18
CASTOR3	230.901	1.75269	0.192058	9.12581	7.12e-20	2.71e-18
ACSM3	2712.94	-2.05653	0.225359	-9.12555	7.14e-20	2.71e-18
GHRHR	68.5336	4.47305	0.490236	9.12428	7.22e-20	2.74e-18
NAT2	1291.55	-3.0112	0.330036	-9.12383	7.25e-20	2.75e-18
AC090015.1	37.4539	7.7974	0.854989	9.11988	7.52e-20	2.85e-18
N4BP3	55.139	2.06614	0.226563	9.11949	7.55e-20	2.85e-18
LRRC55	51.6945	-2.75283	0.301878	-9.11903	7.58e-20	2.86e-18
CERS1	16.8739	4.20694	0.461423	9.11733	7.7e-20	2.9e-18
AC004080.2	4.47394	5.25366	0.576374	9.11502	7.87e-20	2.96e-18
ASIC1	62.8013	3.05327	0.33528	9.10664	8.5e-20	3.19e-18
IL1B	105.673	-2.14217	0.235325	-9.10303	8.78e-20	3.29e-18
HS3ST3A1	24.2916	-1.9328	0.212362	-9.10144	8.91e-20	3.34e-18
APLP1	102.726	2.88206	0.31674	9.09915	9.1e-20	3.4e-18
TEX11	29.2324	3.99757	0.439571	9.09425	9.52e-20	3.55e-18
ZFP36	13966.8	-1.8651	0.205143	-9.0917	9.75e-20	3.63e-18
GAREM2	66.5847	2.13991	0.235464	9.08803	1.01e-19	3.75e-18
KCP	35.9604	2.99634	0.329926	9.08184	1.07e-19	3.95e-18
DIRAS3	220.498	-2.7833	0.306484	-9.08138	1.07e-19	3.97e-18
TINAG	91.6787	6.8071	0.750147	9.07435	1.14e-19	4.23e-18
ITGA2	301.355	2.3053	0.254164	9.07011	1.19e-19	4.38e-18
PCDH17	234.012	1.67901	0.185117	9.06996	1.19e-19	4.38e-18
HOXD10	11.1556	4.66511	0.514534	9.06666	1.23e-19	4.51e-18
PDLIM1P4	19.5833	-1.72477	0.190256	-9.06548	1.24e-19	4.55e-18
TEX41	66.2481	3.63926	0.40165	9.06077	1.3e-19	4.73e-18
SLC6A9	144.744	2.14483	0.237075	9.04707	1.47e-19	5.35e-18
TLCD1	351.681	1.50633	0.166644	9.03924	1.58e-19	5.73e-18
CDC7	103.849	1.8931	0.209503	9.03616	1.62e-19	5.89e-18
LZTS1	166.059	1.60185	0.177393	9.0299	1.72e-19	6.21e-18
PRKAR2A-AS1	40.9858	1.60755	0.178053	9.02853	1.74e-19	6.28e-18
AC015908.3	135.19	-1.52761	0.169295	-9.02333	1.82e-19	6.57e-18
CLEC1B	507.969	-4.43371	0.491457	-9.02157	1.85e-19	6.67e-18
RNF165	117.169	-2.16426	0.240256	-9.00816	2.1e-19	7.5e-18
TESMIN	63.3195	2.20893	0.245372	9.00238	2.21e-19	7.9e-18
AF165147.1	22.3828	-2.48691	0.276265	-9.0019	2.22e-19	7.93e-18
TMEM220	3043.62	-1.55665	0.172931	-9.0016	2.22e-19	7.94e-18
CLEC12A	64.9548	-2.14142	0.237917	-9.00073	2.24e-19	7.98e-18
C17orf53	72.659	1.6677	0.185371	8.99656	2.33e-19	8.27e-18
LAMA3	857.247	2.50181	0.278093	8.99632	2.33e-19	8.28e-18
ADM2	471.486	2.24325	0.249359	8.99606	2.34e-19	8.29e-18
DUXAP10	7.13418	3.93328	0.437598	8.98834	2.51e-19	8.87e-18
TBXA2R	299.993	-1.58966	0.176861	-8.9882	2.51e-19	8.87e-18
EGR1	16069.1	-2.31227	0.257338	-8.98532	2.58e-19	9.09e-18
LINC00221	58.1778	7.72064	0.859414	8.98362	2.62e-19	9.22e-18
RFX8	7.93966	2.20658	0.245878	8.97428	2.85e-19	9.98e-18
CD163	2781.79	-2.03391	0.226682	-8.97251	2.9e-19	1.01e-17
AC110285.6	30.3544	2.06779	0.230614	8.96647	3.06e-19	1.07e-17
EGF	46.5478	5.45125	0.608527	8.95811	3.3e-19	1.15e-17
ETV4	488.231	2.84446	0.317536	8.95789	3.31e-19	1.15e-17
AC239809.3	20.4864	3.48276	0.389112	8.95054	3.54e-19	1.23e-17
FLNC	601.387	3.41333	0.381371	8.95015	3.55e-19	1.23e-17
MAGEB2	34.4823	9.11271	1.01874	8.94509	3.72e-19	1.29e-17
LINC00907	38.9506	-3.61773	0.404827	-8.93647	4.02e-19	1.39e-17
PIMREG	27.6718	2.51248	0.281248	8.93332	4.13e-19	1.42e-17
LILRB5	589.176	-1.93869	0.217065	-8.93137	4.21e-19	1.45e-17
PHEX	29.9297	3.64903	0.408647	8.92953	4.28e-19	1.47e-17
PTGS2	132.299	-2.64955	0.296896	-8.92418	4.49e-19	1.54e-17
MKRN3	14.8019	3.92513	0.439959	8.92159	4.6e-19	1.57e-17
AC087477.4	2.10206	-3.69428	0.414168	-8.91975	4.67e-19	1.6e-17
HOXD3	2.76495	3.70819	0.415913	8.91577	4.84e-19	1.65e-17
AC102953.2	32.0478	1.73058	0.194125	8.91476	4.89e-19	1.66e-17
TEX19	5.62195	4.85864	0.545092	8.91342	4.95e-19	1.68e-17
KCNN3	110.966	1.71422	0.192552	8.90264	5.45e-19	1.85e-17
TRIM7	33.293	2.58306	0.290226	8.90017	5.58e-19	1.89e-17
EEF1A2	3276.55	4.57056	0.51376	8.8963	5.77e-19	1.95e-17
EGR3	137.675	-2.16634	0.243639	-8.89161	6.02e-19	2.03e-17
SAPCD2	62.7719	2.35282	0.264755	8.88678	6.29e-19	2.12e-17
C5orf46	14.0236	3.70916	0.417427	8.88577	6.35e-19	2.14e-17
FAM178B	37.2039	5.13972	0.578425	8.88572	6.35e-19	2.14e-17
CSF3R	282.297	-1.65808	0.186739	-8.87914	6.74e-19	2.26e-17
MAGEC1	109.38	8.97272	1.01055	8.87906	6.74e-19	2.26e-17
RPS6KL1	135.787	1.87175	0.210823	8.87831	6.79e-19	2.28e-17
LINC01116	19.7048	3.35389	0.377899	8.87509	6.99e-19	2.34e-17
HPS5	2359.09	-1.61157	0.181659	-8.87141	7.22e-19	2.41e-17
AC110995.1	17.6676	-1.71491	0.193458	-8.86452	7.68e-19	2.56e-17
LINC01426	78.5053	3.16487	0.357037	8.86427	7.7e-19	2.56e-17
AC016999.1	7.02811	-3.17903	0.358796	-8.86027	7.98e-19	2.64e-17
SRPX	366.463	-2.36839	0.2676	-8.85051	8.71e-19	2.87e-17
TRIM16L	761.522	2.63663	0.297942	8.84948	8.79e-19	2.9e-17
PCDHGA1	25.0985	2.83125	0.320137	8.84388	9.24e-19	3.04e-17
TESC	764.825	2.85593	0.322955	8.84314	9.31e-19	3.06e-17
AC012409.1	54.5634	-2.16925	0.245337	-8.84192	9.41e-19	3.09e-17
SMC1B	20.2077	3.34807	0.379208	8.82913	1.05e-18	3.46e-17
LINC01980	27.2827	7.04366	0.797865	8.82814	1.06e-18	3.48e-17
REEP2	22.3218	2.58113	0.292388	8.82777	1.07e-18	3.49e-17
MCAM	1900.02	1.6595	0.187988	8.82771	1.07e-18	3.49e-17
DCST1-AS1	49.0888	1.62709	0.184379	8.8247	1.1e-18	3.57e-17
AC099850.3	12.1805	2.42641	0.275148	8.81857	1.16e-18	3.76e-17
AC111000.4	62.1942	2.09794	0.237928	8.81756	1.17e-18	3.79e-17
TMCC1-AS1	36.4686	1.73577	0.196859	8.81731	1.17e-18	3.8e-17
KAZN	194.631	-1.84225	0.208944	-8.81696	1.18e-18	3.8e-17
AC026461.2	7.50715	-3.63014	0.411822	-8.81483	1.2e-18	3.87e-17
HOXA3	69.7251	2.79086	0.316701	8.8123	1.23e-18	3.95e-17
GPR35	133.205	2.99745	0.340297	8.80836	1.27e-18	4.09e-17
AC114786.2	24.7176	5.98584	0.680451	8.79688	1.41e-18	4.51e-17
COL24A1	18.1403	3.514	0.399639	8.79293	1.46e-18	4.66e-17
WNT3A	27.8785	7.24655	0.824148	8.79277	1.46e-18	4.66e-17
HMGA1	2268.43	1.64456	0.187067	8.79128	1.48e-18	4.71e-17
MSX1	58.5242	1.87132	0.212877	8.7906	1.49e-18	4.74e-17
DDX12P	31.2707	1.585	0.180316	8.79015	1.49e-18	4.75e-17
PROK2	8.14104	-3.35007	0.381292	-8.78609	1.55e-18	4.92e-17
PLGLA	248.108	-2.57329	0.292919	-8.78499	1.56e-18	4.96e-17
LRRN2	185.872	2.7494	0.313279	8.77621	1.69e-18	5.34e-17
TPBGL	29.2769	3.04258	0.346794	8.77347	1.73e-18	5.46e-17
CYP2C8	45774	-2.48176	0.283006	-8.76929	1.8e-18	5.67e-17
EFNA3	83.0529	2.08475	0.237774	8.76778	1.82e-18	5.74e-17
TRIM59	50.1681	1.66851	0.190324	8.76665	1.84e-18	5.79e-17
LINC01703	17.9461	2.07773	0.237113	8.7626	1.91e-18	5.99e-17
FBXO32	447.908	2.01737	0.23034	8.75824	1.98e-18	6.22e-17
FAM72C	5.77183	3.00333	0.343759	8.73675	2.4e-18	7.49e-17
AC093895.1	6.30198	5.0791	0.581414	8.73577	2.42e-18	7.55e-17
HTR2A-AS1	3.26405	-2.58094	0.295798	-8.72534	2.65e-18	8.24e-17
AC005064.1	1.03958	-3.42468	0.392506	-8.72518	2.66e-18	8.25e-17
KIAA1614	49.8488	1.65122	0.189253	8.72494	2.66e-18	8.26e-17
STK39	333.75	2.11877	0.242952	8.72095	2.76e-18	8.52e-17
AL137060.3	4.31812	2.50084	0.287076	8.71142	3e-18	9.25e-17
BMP5	85.9118	-2.91845	0.335146	-8.70799	3.09e-18	9.52e-17
LIN28B	22.4246	9.83077	1.12918	8.7061	3.15e-18	9.67e-17
CBR3	59.7578	2.485	0.285637	8.69986	3.32e-18	1.02e-16
SHISA4	598.1	1.85902	0.213694	8.69943	3.34e-18	1.02e-16
PCDHB2	41.6268	3.22028	0.370208	8.69858	3.36e-18	1.03e-16
AL136084.3	2.19083	3.84063	0.441731	8.69449	3.48e-18	1.07e-16
AC004816.1	16.008	1.87934	0.216311	8.68815	3.68e-18	1.12e-16
EPB41L4B	4059.92	-1.62898	0.187653	-8.68083	3.93e-18	1.2e-16
EVX1	9.32586	6.13538	0.706878	8.67956	3.97e-18	1.21e-16
TLDC2	69.3194	2.2974	0.264734	8.67812	4.02e-18	1.22e-16
AC010719.1	26.0669	2.26766	0.261359	8.67641	4.08e-18	1.24e-16
AC090227.3	5.82944	-2.87193	0.331064	-8.67487	4.14e-18	1.26e-16
FOXD2-AS1	93.1509	2.016	0.23241	8.67431	4.16e-18	1.26e-16
COL7A1	383.531	3.07875	0.35515	8.66887	4.36e-18	1.32e-16
PRAM1	88.6237	-1.60898	0.185778	-8.66076	4.69e-18	1.41e-16
LINC01833	16.3619	8.34606	0.963922	8.65844	4.78e-18	1.44e-16
WNK4	140.846	3.38573	0.391173	8.65532	4.92e-18	1.48e-16
ADRA1A	1206.49	-2.79253	0.322681	-8.65414	4.97e-18	1.49e-16
LINC01704	1.78475	3.50314	0.404812	8.65375	4.98e-18	1.5e-16
NR4A1	2811.84	-2.13908	0.247214	-8.65276	5.03e-18	1.51e-16
CCNE2	59.5947	2.1266	0.245802	8.65168	5.07e-18	1.52e-16
ADGRB3	22.2663	-2.44625	0.282788	-8.65045	5.13e-18	1.54e-16
MT1X	26583.9	-3.07314	0.355967	-8.6332	5.97e-18	1.77e-16
SMPD3	203.679	-2.32769	0.26969	-8.63097	6.08e-18	1.8e-16
HIST1H2AI	5.19714	3.59097	0.416085	8.63038	6.11e-18	1.81e-16
DNM3OS	48.8198	-1.73932	0.201676	-8.6243	6.45e-18	1.91e-16
AC117386.2	9.73917	5.20757	0.604002	8.62179	6.59e-18	1.94e-16
AL365181.2	74.6081	4.03793	0.468683	8.61547	6.97e-18	2.05e-16
LINC02561	6.85598	3.73192	0.433438	8.61003	7.3e-18	2.15e-16
AC127496.7	13.3278	1.71674	0.199451	8.60735	7.48e-18	2.2e-16
VWF	2909.61	1.90816	0.221756	8.60477	7.65e-18	2.24e-16
MT1E	19049.3	-3.18159	0.369938	-8.60033	7.95e-18	2.33e-16
CXCL2	2750.65	-2.19314	0.255043	-8.5991	8.03e-18	2.35e-16
MS4A7	1070.11	-1.58766	0.184632	-8.59908	8.04e-18	2.35e-16
RTBDN	13.4112	5.37742	0.625594	8.59571	8.28e-18	2.41e-16
MYCN	43.345	3.16028	0.36791	8.58984	8.71e-18	2.54e-16
LINC02476	21.7437	7.36023	0.857009	8.58829	8.83e-18	2.57e-16
SLC22A11	444.864	4.2148	0.490867	8.58644	8.97e-18	2.61e-16
LINC01863	8.62207	-2.84827	0.331734	-8.58599	9.01e-18	2.62e-16
TLX1	82.8565	2.70954	0.315889	8.57753	9.69e-18	2.81e-16
WDR17	8.87107	-1.84477	0.215181	-8.57309	1.01e-17	2.91e-16
FRMD3	191.251	2.27966	0.266013	8.56972	1.04e-17	3e-16
DSCR8	23.9511	7.09243	0.828062	8.5651	1.08e-17	3.11e-16
ZNF681	47.0824	2.24235	0.261922	8.56115	1.12e-17	3.22e-16
MT1L	667.187	-2.85514	0.333574	-8.55923	1.14e-17	3.27e-16
TEX22	11.3241	2.07269	0.24233	8.55318	1.2e-17	3.43e-16
AL136162.1	7.64932	1.73196	0.202498	8.55297	1.2e-17	3.44e-16
ITGA9	1099.07	-1.60291	0.187488	-8.5494	1.24e-17	3.54e-16
TMEM163	123.056	3.57133	0.417919	8.5455	1.28e-17	3.65e-16
PEG10	3292.24	4.16443	0.48785	8.53628	1.39e-17	3.95e-16
B3GALT1	19.7691	4.93887	0.57858	8.53619	1.39e-17	3.95e-16
SCX	13.4596	2.20296	0.258076	8.53612	1.39e-17	3.95e-16
MT3	40.5176	5.17651	0.606476	8.53539	1.4e-17	3.97e-16
CAPN10-DT	21.4132	1.69323	0.198465	8.53161	1.44e-17	4.09e-16
NUDT10	22.5435	-3.09444	0.363245	-8.51888	1.61e-17	4.55e-16
AL121899.1	34.575	2.3351	0.274209	8.51577	1.65e-17	4.67e-16
AC091057.1	39.5685	1.75965	0.206758	8.51066	1.73e-17	4.87e-16
DLK2	36.4842	1.53708	0.180609	8.51058	1.73e-17	4.87e-16
PAGE4	80.3399	6.18381	0.726654	8.50997	1.74e-17	4.9e-16
BICDL1	311.955	2.14237	0.251898	8.50489	1.82e-17	5.1e-16
NXF3	30.3415	-3.03012	0.356332	-8.50365	1.84e-17	5.15e-16
LGI3	36.2428	4.07429	0.479366	8.49933	1.91e-17	5.33e-16
HBA2	664.295	-2.15138	0.253203	-8.49667	1.95e-17	5.44e-16
HIST3H2A	81.4857	3.19856	0.376451	8.49663	1.95e-17	5.44e-16
ADAM23	92.7707	3.27901	0.38611	8.49241	2.02e-17	5.63e-16
MT1XP1	65.2257	-2.98636	0.351749	-8.49002	2.07e-17	5.74e-16
SLC7A6	102.579	1.71507	0.20202	8.48959	2.07e-17	5.76e-16
AC010894.3	13.9341	4.54065	0.534893	8.4889	2.09e-17	5.78e-16
ALDH8A1	8152.65	-1.89167	0.222944	-8.48497	2.16e-17	5.97e-16
FAM78B	96.7687	1.62455	0.191495	8.4835	2.19e-17	6.04e-16
AKR1B15	250.25	4.65873	0.549202	8.48273	2.2e-17	6.07e-16
MIR4435-2HG	460.576	1.83832	0.216836	8.47793	2.29e-17	6.31e-16
CCN1	5237.75	-1.94012	0.228864	-8.47714	2.31e-17	6.34e-16
ZSWIM5	242.684	2.28	0.269062	8.47389	2.37e-17	6.51e-16
ADGRL1	446.128	2.48371	0.293202	8.47099	2.43e-17	6.67e-16
HHIP	480.296	-3.58603	0.423403	-8.46955	2.46e-17	6.74e-16
AADAT	1346.7	-2.26875	0.268125	-8.46153	2.64e-17	7.2e-16
INKA1	46.1055	1.52929	0.180749	8.46085	2.65e-17	7.23e-16
AC245100.3	43.6736	8.94474	1.0581	8.45359	2.82e-17	7.68e-16
PI15	41.0402	3.74652	0.443278	8.45185	2.87e-17	7.78e-16
AC147651.1	16.941	2.33411	0.276193	8.451	2.89e-17	7.83e-16
PDE1C	19.2352	2.12574	0.251619	8.44824	2.96e-17	8e-16
GHR	7506.76	-2.07966	0.246225	-8.44618	3.01e-17	8.14e-16
CTNNA2	196.565	5.91135	0.699915	8.44581	3.02e-17	8.16e-16
FBXW10	27.0972	3.9089	0.463189	8.43909	3.2e-17	8.61e-16
NTM	63.0818	3.29835	0.391072	8.43412	3.34e-17	8.97e-16
RHPN1	196.955	1.79248	0.212696	8.42739	3.53e-17	9.49e-16
FNDC10	181.315	2.9325	0.348172	8.42257	3.68e-17	9.85e-16
PRR19	62.1381	2.62976	0.312307	8.42044	3.75e-17	1e-15
PYCR1	600.827	2.69313	0.319868	8.41952	3.78e-17	1.01e-15
AP001469.3	22.3994	1.75827	0.208835	8.41941	3.78e-17	1.01e-15
AC013275.1	62.0788	3.09466	0.367752	8.41507	3.93e-17	1.05e-15
GNAL	165.701	2.08501	0.247803	8.41399	3.96e-17	1.05e-15
AC011447.7	14.942	2.94738	0.350304	8.41376	3.97e-17	1.06e-15
PLXNC1	565.977	2.18328	0.259503	8.41331	3.99e-17	1.06e-15
VAX2	13.3275	3.60129	0.428061	8.41304	4e-17	1.06e-15
CYP2B6	18007.8	-2.563	0.304701	-8.41151	4.05e-17	1.07e-15
SRARP	31.9992	5.27199	0.627291	8.40437	4.3e-17	1.14e-15
LUCAT1	40.1843	4.26776	0.508033	8.40054	4.44e-17	1.17e-15
LINC01108	11.669	3.47301	0.413516	8.39873	4.51e-17	1.19e-15
TMEM266	46.0046	2.32155	0.276448	8.39775	4.55e-17	1.2e-15
LINC00707	3.50072	-3.50018	0.416808	-8.39759	4.56e-17	1.2e-15
NPFFR2	15.3257	5.30298	0.631736	8.3943	4.69e-17	1.23e-15
GPR19	12.2027	2.47967	0.295744	8.38451	5.09e-17	1.33e-15
PVALB	41.2479	-3.07453	0.367021	-8.37697	5.43e-17	1.42e-15
AC114316.1	4.70299	4.27211	0.510096	8.3751	5.52e-17	1.44e-15
MEP1A	39.5518	4.17093	0.49814	8.373	5.62e-17	1.46e-15
DLX5	6.6552	4.80605	0.573996	8.37296	5.62e-17	1.46e-15
RSPO3	160.548	-3.10958	0.371498	-8.37037	5.74e-17	1.49e-15
APOBEC3B	158.997	2.52562	0.301774	8.36924	5.8e-17	1.5e-15
PNRC1	6984.67	-1.54546	0.184662	-8.36913	5.8e-17	1.5e-15
HOXD4	4.08314	4.80975	0.574868	8.36671	5.93e-17	1.53e-15
ARHGAP10	441.888	-1.71003	0.204403	-8.366	5.96e-17	1.54e-15
PHLDA1	9324.56	-2.14643	0.256908	-8.35486	6.55e-17	1.69e-15
ACADSB	20352.5	-1.54945	0.185463	-8.3545	6.57e-17	1.69e-15
FCAR	9.28909	-2.61256	0.31276	-8.35326	6.64e-17	1.71e-15
RGMA	31.2131	2.05572	0.246357	8.34447	7.15e-17	1.83e-15
TFPI2	228.907	-2.35936	0.282759	-8.34406	7.18e-17	1.84e-15
P2RY12	32.3857	-2.27264	0.27237	-8.34394	7.19e-17	1.84e-15
PZP	3040.7	-3.89893	0.467505	-8.33986	7.44e-17	1.9e-15
GTSF1	123.94	4.11174	0.493314	8.33493	7.75e-17	1.97e-15
TMEM178B	84.5274	3.37283	0.404676	8.33465	7.77e-17	1.98e-15
STAU2-AS1	5.78605	2.93044	0.351668	8.33296	7.88e-17	2e-15
KCNN1	11.0256	2.77352	0.33336	8.31988	8.81e-17	2.23e-15
IL10	19.9342	-1.91274	0.229909	-8.31954	8.83e-17	2.23e-15
CREG2	5.40471	3.01056	0.361956	8.31749	8.98e-17	2.27e-15
CETP	1044.14	-2.31696	0.278577	-8.31711	9.01e-17	2.28e-15
NGFR	1099.27	-2.10142	0.25279	-8.31289	9.34e-17	2.35e-15
ZNF883	27.2203	2.82727	0.340383	8.30613	9.89e-17	2.49e-15
LINC01093	941.534	-3.29726	0.396976	-8.30595	9.9e-17	2.49e-15
LINC01727	16.3588	-3.3059	0.39816	-8.30295	1.02e-16	2.55e-15
CYP4A11	38618.5	-2.03727	0.245387	-8.30226	1.02e-16	2.56e-15
AC093725.2	2.41699	-3.50787	0.422938	-8.29405	1.09e-16	2.73e-15
CCNO	46.8379	3.40209	0.410189	8.29395	1.1e-16	2.73e-15
UNC5A	19.7961	2.68305	0.323522	8.29325	1.1e-16	2.75e-15
CLDN15	1281.13	1.75953	0.21217	8.29304	1.1e-16	2.75e-15
DCST1	10.0747	1.87427	0.226083	8.29021	1.13e-16	2.81e-15
CYP19A1	14.1082	4.74266	0.572309	8.28688	1.16e-16	2.89e-15
ATP13A4	22.162	-2.46851	0.298014	-8.28321	1.2e-16	2.98e-15
IBSP	6.99539	5.3595	0.647223	8.28076	1.22e-16	3.03e-15
RASGEF1B	1734.2	-1.65973	0.200598	-8.27392	1.3e-16	3.21e-15
VASH2	65.0058	2.47529	0.299203	8.27293	1.31e-16	3.23e-15
MAT1A	80306.9	-1.73389	0.209814	-8.26395	1.41e-16	3.48e-15
LINC02585	5.12351	2.45059	0.296626	8.26157	1.44e-16	3.55e-15
SLC5A1	180.883	-3.27059	0.396008	-8.2589	1.47e-16	3.62e-15
SMIM25	89.8729	-1.78628	0.216288	-8.25883	1.47e-16	3.62e-15
GAD1	16.9297	4.45	0.5391	8.2545	1.53e-16	3.75e-15
HIST1H3H	90.2207	1.84469	0.22348	8.25439	1.53e-16	3.75e-15
TYMS	524.683	1.68849	0.204595	8.25287	1.55e-16	3.8e-15
DKK1	130.093	4.19327	0.508392	8.24811	1.61e-16	3.95e-15
ISL2	9.39147	3.89844	0.472796	8.24549	1.64e-16	4.03e-15
RPL31P11	2.97454	-2.17777	0.264142	-8.2447	1.66e-16	4.04e-15
ZNF607	73.3934	1.55172	0.188213	8.24451	1.66e-16	4.05e-15
ACSL1	49977.1	-1.79497	0.217787	-8.24186	1.7e-16	4.14e-15
TEAD2	638.001	1.5045	0.18263	8.23796	1.75e-16	4.26e-15
GPSM1	356.716	1.95488	0.237308	8.23773	1.76e-16	4.26e-15
GIHCG	65.6226	1.56017	0.189524	8.23204	1.84e-16	4.47e-15
FANCB	10.2215	2.03552	0.247293	8.23122	1.85e-16	4.49e-15
EGR2	415.973	-2.33252	0.283466	-8.22857	1.89e-16	4.59e-15
SOWAHA	341.086	1.77077	0.215235	8.22714	1.92e-16	4.63e-15
F2RL3	113.268	2.34355	0.285009	8.22271	1.99e-16	4.8e-15
CDCA7	65.0021	3.03112	0.368649	8.22225	2e-16	4.82e-15
TPT1P12	3.72195	-2.66854	0.324568	-8.2218	2e-16	4.83e-15
MEX3A	149.444	1.54272	0.187681	8.21991	2.04e-16	4.9e-15
SIGLEC1	754.852	-1.61718	0.196899	-8.21326	2.15e-16	5.18e-15
ARFGEF3	206.416	2.92705	0.356415	8.21247	2.17e-16	5.21e-15
SEZ6	24.6319	4.30613	0.524471	8.21042	2.2e-16	5.28e-15
LINC02723	3.81696	-2.02597	0.246758	-8.21036	2.21e-16	5.28e-15
EPHX4	7.94521	2.70836	0.329913	8.20933	2.22e-16	5.32e-15
MATN3	17.2777	2.74621	0.334926	8.19945	2.41e-16	5.76e-15
AC245128.3	8.76641	-2.744	0.334706	-8.19824	2.44e-16	5.82e-15
GSDMC	9.8449	3.42546	0.417849	8.19783	2.45e-16	5.83e-15
SSTR5-AS1	60.9428	5.43404	0.663175	8.19397	2.53e-16	6.01e-15
SNHG4	15.1184	1.9844	0.242293	8.19007	2.61e-16	6.2e-15
RMI2	190.03	1.96088	0.239591	8.18426	2.74e-16	6.49e-15
AC010280.2	58.867	-2.62562	0.321014	-8.17915	2.86e-16	6.76e-15
IL33	759.617	-1.82954	0.223784	-8.17544	2.95e-16	6.97e-15
FAM171A2	37.4558	2.13363	0.261065	8.17281	3.01e-16	7.11e-15
PABPC4L	14.1683	1.51292	0.185318	8.16392	3.24e-16	7.64e-15
ANKRD29	257.869	1.81654	0.222546	8.16254	3.28e-16	7.72e-15
AC116049.2	5.7195	4.88513	0.598489	8.16245	3.28e-16	7.72e-15
SLC2A5	92.6987	2.97617	0.364727	8.16	3.35e-16	7.87e-15
FBP1	27875.6	-2.03734	0.249805	-8.1557	3.47e-16	8.15e-15
LINC01235	13.9272	3.2972	0.404289	8.15555	3.48e-16	8.16e-15
LYVE1	996.199	-2.43851	0.299094	-8.153	3.55e-16	8.32e-15
AC006960.2	6.66624	-4.74077	0.581527	-8.15228	3.57e-16	8.35e-15
AMHR2	22.3685	-3.11564	0.382256	-8.15068	3.62e-16	8.45e-15
GRPR	24.6365	4.03268	0.494956	8.14754	3.71e-16	8.66e-15
PTPN14	389.139	1.5088	0.185186	8.14749	3.72e-16	8.66e-15
SLITRK6	22.6668	-3.18222	0.390748	-8.14393	3.83e-16	8.9e-15
DHODH	4893.23	-1.69776	0.208509	-8.14237	3.88e-16	9.01e-15
HRCT1	208.536	2.67206	0.32819	8.14179	3.89e-16	9.04e-15
AQP8	72.5578	3.82764	0.47017	8.14096	3.92e-16	9.1e-15
CLEC4M	760.371	-4.44715	0.546306	-8.14041	3.94e-16	9.13e-15
TXNRD1	5986.06	1.62212	0.199287	8.1396	3.97e-16	9.19e-15
GABRP	102.953	-3.1556	0.387795	-8.1373	4.04e-16	9.36e-15
ARID3A	307.287	1.77427	0.21831	8.1273	4.39e-16	1.01e-14
ANO2	14.8685	1.95697	0.240807	8.12672	4.41e-16	1.02e-14
JUNB	7938.49	-1.52333	0.18761	-8.11968	4.67e-16	1.08e-14
ADGRE1	79.2752	-2.11707	0.260739	-8.11953	4.68e-16	1.08e-14
AC011503.1	9.36899	5.00578	0.616937	8.11392	4.9e-16	1.12e-14
GINS4	74.7654	1.60062	0.197281	8.11338	4.92e-16	1.13e-14
VSIG4	828.512	-1.8884	0.232784	-8.11225	4.97e-16	1.14e-14
TRAPPC3L	5.01478	-2.11115	0.260473	-8.10509	5.27e-16	1.21e-14
AC129507.1	24.8037	-1.79976	0.22224	-8.09827	5.57e-16	1.27e-14
ZNF300	65.7187	1.98466	0.245112	8.09695	5.64e-16	1.28e-14
RIBC2	23.0461	2.47944	0.30638	8.09271	5.84e-16	1.33e-14
SMUG1P1	92.7088	-3.36046	0.415372	-8.09023	5.96e-16	1.35e-14
INMT	1220.78	-2.30902	0.285532	-8.08672	6.13e-16	1.39e-14
EPPK1	165.365	2.65437	0.328475	8.08089	6.43e-16	1.46e-14
S100A8	289.251	-2.23913	0.277671	-8.06398	7.39e-16	1.67e-14
LDLRAD1	70.9012	4.08025	0.506136	8.06157	7.53e-16	1.7e-14
KCNU1	43.8085	6.76132	0.838782	8.06088	7.57e-16	1.7e-14
RHPN1-AS1	25.5448	1.53494	0.190439	8.06	7.63e-16	1.71e-14
AL355488.1	57.9725	1.61223	0.200046	8.05928	7.67e-16	1.72e-14
TTLL4	803.131	1.75375	0.217771	8.05318	8.07e-16	1.81e-14
SLC45A4	291.639	2.0555	0.255284	8.05178	8.16e-16	1.83e-14
ALDH3A1	1903.82	4.18309	0.519615	8.05035	8.26e-16	1.85e-14
IRF4	102.545	-2.34527	0.291429	-8.04747	8.45e-16	1.89e-14
IL1RN	5817.27	-2.20603	0.274423	-8.03881	9.07e-16	2.02e-14
CNDP1	1820.48	-3.46001	0.430638	-8.03462	9.39e-16	2.09e-14
LINC02163	7.76739	5.99148	0.745754	8.03412	9.42e-16	2.1e-14
MT2A	72930.2	-2.65814	0.331009	-8.03042	9.71e-16	2.16e-14
CXCR2	37.6614	-2.35568	0.293352	-8.03022	9.73e-16	2.16e-14
C12orf75	400.081	2.4368	0.30348	8.02954	9.78e-16	2.17e-14
DCN	8679.12	-2.36925	0.295081	-8.02915	9.81e-16	2.17e-14
ALPL	3767.85	-1.91524	0.238645	-8.02548	1.01e-15	2.23e-14
MYO1A	51.4531	2.24849	0.280221	8.02397	1.02e-15	2.26e-14
RPL18P13	5.93117	4.75687	0.593119	8.02009	1.06e-15	2.33e-14
RNF125	1026.78	-1.64224	0.204797	-8.01888	1.07e-15	2.35e-14
AL138828.1	24.7551	3.53313	0.440609	8.01874	1.07e-15	2.35e-14
AC112777.1	4.83667	3.27446	0.408577	8.01431	1.11e-15	2.43e-14
LEF1-AS1	3.66625	4.00405	0.499843	8.01062	1.14e-15	2.5e-14
LHFPL4	26.1948	4.60644	0.575082	8.01005	1.15e-15	2.51e-14
ATP2A1-AS1	8.30599	2.5735	0.3213	8.00965	1.15e-15	2.51e-14
EBF3	20.3362	1.8911	0.236294	8.00319	1.21e-15	2.65e-14
LINC00482	113.176	1.7183	0.214779	8.00032	1.24e-15	2.71e-14
AC003973.2	35.6807	3.27043	0.408991	7.99634	1.28e-15	2.79e-14
PCK1	87432.3	-2.28885	0.286256	-7.99581	1.29e-15	2.8e-14
AC116025.2	2.93875	3.25799	0.407504	7.99499	1.3e-15	2.82e-14
HIST1H2AM	5.19614	2.36226	0.295595	7.99155	1.33e-15	2.89e-14
RTKN2	33.2111	2.50375	0.313374	7.98966	1.35e-15	2.93e-14
FAM81A	31.5589	2.19623	0.274909	7.98896	1.36e-15	2.95e-14
HMOX1	4738.78	-1.76031	0.220459	-7.98474	1.41e-15	3.04e-14
TKT	9443.64	1.5831	0.19834	7.98174	1.44e-15	3.11e-14
PITPNM3	161.535	-2.53678	0.317909	-7.97959	1.47e-15	3.16e-14
FPR2	36.9865	-2.64654	0.331743	-7.97766	1.49e-15	3.21e-14
UBD	2231.47	2.78247	0.349011	7.97244	1.56e-15	3.34e-14
SCN4B	99.6404	1.56012	0.195702	7.97191	1.56e-15	3.35e-14
LINC01311	11.7064	1.50228	0.188449	7.97182	1.56e-15	3.35e-14
FAM72B	10.8602	2.11084	0.264813	7.97105	1.57e-15	3.37e-14
KCNH6	14.5559	4.33768	0.544195	7.97082	1.58e-15	3.37e-14
GRAMD1C	796.426	-1.5633	0.196136	-7.97048	1.58e-15	3.38e-14
AC026369.3	10.6306	-2.79134	0.350504	-7.96378	1.67e-15	3.56e-14
CRYBG2	85.548	2.5548	0.320837	7.96293	1.68e-15	3.58e-14
DLG5	440.432	1.54485	0.19412	7.95825	1.74e-15	3.71e-14
SLC4A11	45.1219	2.62335	0.329687	7.95708	1.76e-15	3.75e-14
AC092155.1	8.64832	-2.44962	0.307864	-7.95682	1.77e-15	3.75e-14
P2RY13	180.127	-1.84811	0.232572	-7.94637	1.92e-15	4.08e-14
RHBDL1	78.545	1.8806	0.236701	7.94503	1.94e-15	4.12e-14
OSBP2	111.775	1.50427	0.189335	7.94502	1.94e-15	4.12e-14
KCTD17	429.484	1.99262	0.250808	7.94478	1.95e-15	4.12e-14
AL121892.1	1.12491	-3.24318	0.408512	-7.93901	2.04e-15	4.3e-14
NR4A3	414.772	-2.17977	0.274596	-7.93808	2.05e-15	4.33e-14
LOXHD1	5.31859	3.10931	0.391885	7.93424	2.12e-15	4.46e-14
HIST2H4A	11.2555	2.16851	0.273326	7.93379	2.13e-15	4.47e-14
ZNF385D	72.2226	3.1202	0.393317	7.93305	2.14e-15	4.49e-14
CXCR1	38.8446	-2.38658	0.301216	-7.92313	2.32e-15	4.86e-14
EPHB1	87.4529	-1.96439	0.247968	-7.92195	2.34e-15	4.9e-14
GADD45B	12855.8	-1.81159	0.228755	-7.91937	2.39e-15	4.98e-14
CLEC2L	15.1131	5.96108	0.752739	7.91919	2.39e-15	4.98e-14
AC015468.1	3.23305	-2.83609	0.358146	-7.9188	2.4e-15	5e-14
LILRA5	138.467	-1.92781	0.243552	-7.91538	2.46e-15	5.13e-14
FIRRE	7.58861	3.55156	0.448793	7.91359	2.5e-15	5.2e-14
AL359510.2	4.5444	2.88279	0.364739	7.90371	2.71e-15	5.62e-14
FAM155B	49.2231	2.91824	0.369348	7.90105	2.77e-15	5.73e-14
KCNJ11	96.8086	1.91197	0.242019	7.90006	2.79e-15	5.78e-14
PNMA3	100.147	3.13123	0.396407	7.89903	2.81e-15	5.82e-14
ST8SIA6	18.435	-2.40181	0.304065	-7.89898	2.81e-15	5.82e-14
HOXC6	15.3033	5.13151	0.649932	7.89546	2.89e-15	5.97e-14
RFPL4B	21.7458	7.18414	0.910279	7.89224	2.97e-15	6.11e-14
AL353708.3	7.14886	1.93933	0.245735	7.89194	2.98e-15	6.12e-14
BANF2	5.34257	4.95309	0.627643	7.89158	2.98e-15	6.13e-14
MAFA-AS1	7.29286	5.89848	0.747594	7.88995	3.02e-15	6.21e-14
TRIM17	13.8232	3.15746	0.400386	7.88605	3.12e-15	6.39e-14
PCAT6	52.8859	1.68012	0.213075	7.88514	3.14e-15	6.43e-14
VSIG1	61.2707	4.16205	0.528175	7.88005	3.27e-15	6.68e-14
TIGD3	24.008	2.08419	0.26456	7.87793	3.33e-15	6.79e-14
PDE4C	45.8864	1.8428	0.234001	7.87519	3.4e-15	6.93e-14
LINC01224	13.5455	4.42247	0.561707	7.87326	3.46e-15	7.03e-14
HOXD-AS2	5.28199	4.10598	0.5217	7.87039	3.54e-15	7.18e-14
LINC00683	7.70552	-2.80383	0.356389	-7.86732	3.62e-15	7.35e-14
PPP4R3C	42.3712	8.98989	1.14344	7.86215	3.78e-15	7.65e-14
ZNF695	5.5459	4.24591	0.540047	7.86211	3.78e-15	7.65e-14
SCIMP	200.412	-1.59255	0.202575	-7.8615	3.8e-15	7.69e-14
MSH5	42.0013	1.70377	0.216928	7.8541	4.03e-15	8.13e-14
GBA3	3621.19	-2.21577	0.282215	-7.85133	4.12e-15	8.31e-14
CD244	85.1167	-1.77268	0.225941	-7.84575	4.3e-15	8.68e-14
MCC	1265.33	-1.56727	0.199787	-7.84467	4.34e-15	8.75e-14
SP5	263.453	2.44196	0.3113	7.84439	4.35e-15	8.76e-14
ZNF716	9.86046	5.79941	0.739381	7.8436	4.38e-15	8.81e-14
AP002954.1	6.60826	-2.06823	0.263927	-7.83637	4.64e-15	9.31e-14
SRXN1	130.247	1.65146	0.210887	7.83105	4.84e-15	9.7e-14
REG1A	162.072	6.10861	0.780497	7.82657	5.01e-15	1e-13
MCF2L2	22.7303	2.63098	0.33627	7.82401	5.12e-15	1.02e-13
AC016885.3	9.04472	6.08864	0.778415	7.82184	5.21e-15	1.04e-13
LINC00942	15.1855	4.8883	0.625053	7.82062	5.26e-15	1.05e-13
KRT20	25.4089	7.25688	0.927958	7.82027	5.27e-15	1.05e-13
ATF3	3540.89	-1.63517	0.209341	-7.81104	5.67e-15	1.13e-13
CKB	2185.2	2.56611	0.328637	7.80834	5.79e-15	1.15e-13
CXCR2P1	228.978	-2.21138	0.283213	-7.80818	5.8e-15	1.15e-13
PPP1R16A	4080.34	1.56109	0.199931	7.80813	5.8e-15	1.15e-13
HSPB1P1	62.6309	1.82434	0.233697	7.80642	5.88e-15	1.17e-13
SCGB3A1	42.7682	-2.37356	0.304113	-7.80487	5.96e-15	1.18e-13
KIF1A	299.034	3.72455	0.477502	7.80007	6.19e-15	1.22e-13
PKM	4949.16	1.83217	0.235012	7.7961	6.39e-15	1.26e-13
BCAS4	116.51	1.55913	0.200013	7.79512	6.43e-15	1.27e-13
ALB	4.98253e+06	-1.8276	0.234532	-7.79256	6.57e-15	1.29e-13
TUBB4A	252.095	3.22686	0.414122	7.79205	6.59e-15	1.3e-13
CNTNAP4	28.4747	4.27713	0.549091	7.78947	6.73e-15	1.32e-13
PNCK	21.5846	5.28973	0.679298	7.78706	6.86e-15	1.35e-13
RTN2	300.462	1.53318	0.196915	7.78602	6.92e-15	1.36e-13
CLIP2	779.622	1.72846	0.22234	7.77394	7.61e-15	1.49e-13
CNNM1	202.411	3.00586	0.386712	7.77286	7.67e-15	1.5e-13
CYP2C9	35786.9	-2.0662	0.26583	-7.77265	7.69e-15	1.5e-13
PRR36	52.5572	2.29457	0.295221	7.77239	7.7e-15	1.5e-13
AL590226.2	54.1006	2.31029	0.297297	7.77098	7.79e-15	1.52e-13
MIR4664	10.7231	2.27457	0.292743	7.76985	7.86e-15	1.53e-13
ASIC3	38.5667	1.81925	0.234145	7.76977	7.86e-15	1.53e-13
P3H2	282.727	-1.52699	0.19654	-7.76938	7.89e-15	1.53e-13
GINS2	213.896	1.59302	0.205133	7.76583	8.11e-15	1.58e-13
FTCD	22909.6	-1.81539	0.233775	-7.76556	8.13e-15	1.58e-13
KCNQ3	15.1306	2.1207	0.273156	7.76367	8.25e-15	1.6e-13
PLPPR4	13.7418	2.74382	0.353467	7.76257	8.32e-15	1.61e-13
DNM1P35	13.413	1.8594	0.239597	7.76051	8.46e-15	1.64e-13
LINC01535	7.37588	3.30324	0.425682	7.75987	8.5e-15	1.64e-13
PAEP	59.5006	6.96913	0.898226	7.75877	8.58e-15	1.66e-13
IRX3	136.535	2.55092	0.328815	7.75792	8.63e-15	1.67e-13
LRRC10B	16.8855	2.05637	0.265297	7.75122	9.1e-15	1.75e-13
ACTL8	15.09	5.99878	0.774116	7.74921	9.25e-15	1.78e-13
PRRX1	70.3823	2.11899	0.273483	7.74815	9.32e-15	1.79e-13
AC026740.1	19.4654	2.14922	0.277412	7.7474	9.38e-15	1.8e-13
FAM162B	24.1537	1.52694	0.197165	7.74446	9.6e-15	1.84e-13
TAL2	5.74598	3.22738	0.417007	7.73939	9.99e-15	1.91e-13
MT1G	34617.2	-3.5516	0.458904	-7.73929	1e-14	1.91e-13
COL22A1	33.7317	3.09934	0.400695	7.7349	1.03e-14	1.98e-13
MAGEA8	13.6006	6.21011	0.803449	7.72931	1.08e-14	2.06e-13
CEND1	9.67095	2.97518	0.385049	7.72676	1.1e-14	2.1e-13
PCA3	2.057	-3.72085	0.481822	-7.72244	1.14e-14	2.18e-13
STEAP3-AS1	11.3577	-1.5419	0.199997	-7.70961	1.26e-14	2.4e-13
SCG2	8.73273	3.65444	0.474082	7.70845	1.27e-14	2.42e-13
FAM72A	14.1024	1.78829	0.231995	7.70831	1.27e-14	2.42e-13
BRSK1	67.8161	1.68275	0.218325	7.70754	1.28e-14	2.43e-13
AL158212.3	43.5778	1.58992	0.206296	7.70698	1.29e-14	2.44e-13
LAPTM4B	3524.42	1.59307	0.206762	7.70487	1.31e-14	2.48e-13
SLC22A10	2606.6	-2.38498	0.309748	-7.69976	1.36e-14	2.57e-13
DIRAS1	30.5263	3.24797	0.421829	7.69974	1.36e-14	2.57e-13
FAM13A	1818.44	-1.79254	0.232824	-7.69912	1.37e-14	2.58e-13
EPHA2	2657.37	-1.82754	0.23746	-7.69621	1.4e-14	2.64e-13
SMKR1	8.67039	2.8596	0.371575	7.69589	1.41e-14	2.64e-13
POPDC3	15.8702	5.81174	0.755468	7.6929	1.44e-14	2.7e-13
HIST1H3D	17.3903	2.14549	0.279064	7.68816	1.49e-14	2.81e-13
NT5M	112.063	1.68292	0.219019	7.68392	1.54e-14	2.89e-13
AKR1C7P	13.1468	2.5973	0.338042	7.68338	1.55e-14	2.9e-13
TTC9	748.98	2.12099	0.276104	7.68184	1.57e-14	2.93e-13
BEND4	8.15444	-2.36529	0.307911	-7.68173	1.57e-14	2.93e-13
MRPS36P4	1.29011	-3.26966	0.425679	-7.68105	1.58e-14	2.95e-13
U73166.1	10.2544	1.82951	0.23821	7.68026	1.59e-14	2.96e-13
HBB	1970.66	-2.03096	0.264472	-7.6793	1.6e-14	2.98e-13
AC132872.2	3.49065	2.35729	0.307163	7.6744	1.66e-14	3.09e-13
RAB3D	270.644	2.18391	0.284634	7.67268	1.68e-14	3.13e-13
OSBPL3	210.949	1.53858	0.200603	7.66976	1.72e-14	3.2e-13
GABRE	320.213	2.16809	0.282724	7.66857	1.74e-14	3.23e-13
GLYATL1	9550.27	-1.77242	0.231188	-7.66658	1.77e-14	3.28e-13
LINC02685	2.3288	3.48931	0.45543	7.66159	1.84e-14	3.4e-13
STMND1	25.2775	3.1962	0.417331	7.65867	1.88e-14	3.48e-13
CLTRN	687.282	-2.25111	0.29409	-7.6545	1.94e-14	3.59e-13
EPHB2	294.945	2.55166	0.333467	7.65191	1.98e-14	3.66e-13
PRND	10.5797	3.02158	0.395574	7.63846	2.2e-14	4.05e-13
DCST2	37.9042	1.51195	0.198272	7.62564	2.43e-14	4.45e-13
FHDC1	36.6061	1.90699	0.250141	7.62368	2.47e-14	4.52e-13
TCHH	22.3782	-2.00005	0.262514	-7.61882	2.56e-14	4.68e-13
TMIGD3	181.942	-1.64613	0.216191	-7.61427	2.65e-14	4.84e-13
LINC01186	12.9781	2.93825	0.385921	7.61362	2.67e-14	4.87e-13
KCNE5	23.8773	3.2416	0.426198	7.60587	2.83e-14	5.16e-13
ARHGEF37	325.287	1.78916	0.235266	7.60483	2.85e-14	5.2e-13
AKR1B10	15910.8	3.79205	0.498662	7.60444	2.86e-14	5.21e-13
MTMR11	341.488	1.84427	0.242535	7.60417	2.87e-14	5.22e-13
NAP1L4P1	17.637	2.79379	0.3675	7.60215	2.91e-14	5.3e-13
RFPL1	3.77193	-3.54783	0.466728	-7.6015	2.93e-14	5.32e-13
AFF2	14.5267	3.68317	0.484678	7.59921	2.98e-14	5.41e-13
AP004782.1	5.45422	-2.40287	0.316491	-7.5922	3.15e-14	5.69e-13
IGLV10-54	26.5796	-3.43513	0.452456	-7.59218	3.15e-14	5.69e-13
PMFBP1	17.709	2.12549	0.280079	7.58888	3.23e-14	5.83e-13
CAPN9	13.8831	2.68803	0.354286	7.58717	3.27e-14	5.9e-13
TSACC	37.8359	1.54376	0.203603	7.58217	3.4e-14	6.13e-13
KCNE1	14.9484	-1.93139	0.254781	-7.58056	3.44e-14	6.2e-13
OMG	14.3814	-1.66803	0.220157	-7.57651	3.55e-14	6.38e-13
TFAP2A-AS1	7.69923	3.76947	0.497577	7.57566	3.57e-14	6.42e-13
MT2P1	253.359	-2.77426	0.366264	-7.57447	3.61e-14	6.47e-13
AC005829.1	8.17608	2.21578	0.292557	7.57383	3.62e-14	6.5e-13
CYP3A43	279.911	-2.23532	0.295143	-7.57368	3.63e-14	6.5e-13
SLC5A11	96.5069	2.87743	0.379926	7.57367	3.63e-14	6.5e-13
PTGES	175.356	3.15994	0.417663	7.56576	3.86e-14	6.9e-13
MT1M	3561.98	-3.35604	0.4437	-7.56375	3.92e-14	7e-13
RPLP0P2	10.0964	2.19241	0.289913	7.56232	3.96e-14	7.07e-13
SNX22	341.009	1.83636	0.242918	7.55961	4.04e-14	7.21e-13
TREML3P	22.4038	5.17755	0.684918	7.55937	4.05e-14	7.21e-13
AL445228.2	3.06313	3.14315	0.415918	7.55715	4.12e-14	7.34e-13
GRIK4	21.5774	2.66186	0.352339	7.55482	4.19e-14	7.46e-13
ANKS1B	37.4613	2.72069	0.360354	7.55005	4.35e-14	7.73e-13
AP003068.4	24.8108	2.75068	0.364356	7.54942	4.37e-14	7.76e-13
COL8A1	205.649	1.76855	0.234504	7.54164	4.64e-14	8.22e-13
CDH8	5.81328	3.92434	0.520429	7.54058	4.68e-14	8.28e-13
AL451050.2	4.3056	1.95242	0.259028	7.53748	4.79e-14	8.46e-13
CACNA1E	7.50047	3.09758	0.411218	7.5327	4.97e-14	8.76e-13
KRT86	41.3987	2.57621	0.342281	7.5266	5.21e-14	9.15e-13
KPNA7	39.2763	2.3057	0.306407	7.52495	5.27e-14	9.26e-13
C6	27417.1	-1.68356	0.22376	-7.52396	5.31e-14	9.33e-13
HK3	242.273	-1.65689	0.220233	-7.52333	5.34e-14	9.37e-13
TSPO2	21.1505	2.21211	0.294111	7.52134	5.42e-14	9.5e-13
GABRR3	23.5918	4.4495	0.591862	7.5178	5.57e-14	9.75e-13
DDX53	19.3444	7.24944	0.964497	7.5163	5.63e-14	9.85e-13
TNNC1	47.9999	2.3788	0.316555	7.51467	5.71e-14	9.97e-13
SYP	64.9044	1.66819	0.222151	7.50925	5.95e-14	1.04e-12
AC024230.1	4.97406	5.2848	0.704035	7.50644	6.08e-14	1.06e-12
TYRP1	22.0874	4.30707	0.574381	7.49863	6.45e-14	1.12e-12
RET	206.472	-2.64229	0.352382	-7.49835	6.46e-14	1.12e-12
CPXM1	71.1555	2.13168	0.284416	7.49493	6.63e-14	1.15e-12
LINC00689	14.9315	3.88839	0.51958	7.48372	7.22e-14	1.25e-12
AP000523.1	4.09177	3.43829	0.459649	7.48025	7.42e-14	1.28e-12
ACTG2	172.9	1.84466	0.246679	7.47797	7.55e-14	1.3e-12
AC103706.1	25.2289	1.80283	0.241087	7.47792	7.55e-14	1.3e-12
SYT10	6.09051	-3.38274	0.452513	-7.47546	7.69e-14	1.32e-12
PFN1P11	23.3457	3.29804	0.44126	7.47413	7.77e-14	1.33e-12
ZIC4	61.0396	3.65055	0.48854	7.47238	7.88e-14	1.35e-12
HOGA1	1908.35	-1.82073	0.243707	-7.47097	7.96e-14	1.36e-12
C20orf144	2.97808	2.22602	0.297989	7.47012	8.01e-14	1.37e-12
MNS1	126.38	2.48508	0.33272	7.46899	8.08e-14	1.38e-12
NCAPD2P1	6.32271	4.73995	0.634771	7.46719	8.19e-14	1.4e-12
SFRP1	191.175	-2.39257	0.320479	-7.46558	8.29e-14	1.42e-12
MIR9-3HG	55.3048	3.15497	0.422623	7.4652	8.32e-14	1.42e-12
KLRF1	30.656	-1.61661	0.216608	-7.4633	8.44e-14	1.44e-12
NLRP12	8.86089	-1.5763	0.211253	-7.46168	8.54e-14	1.45e-12
HID1-AS1	7.98786	-1.53982	0.206441	-7.45888	8.73e-14	1.48e-12
PDZK1IP1	1678.89	3.11876	0.418131	7.45882	8.73e-14	1.48e-12
GUCY2C	125.395	2.9155	0.390955	7.45738	8.83e-14	1.5e-12
AC006252.1	4.57472	2.19267	0.294169	7.45377	9.07e-14	1.54e-12
PLGLB2	300.59	-1.79994	0.24151	-7.45284	9.14e-14	1.55e-12
VSIG10L	235.7	1.94738	0.26132	7.4521	9.19e-14	1.55e-12
C19orf81	10.0127	5.21517	0.699916	7.45114	9.25e-14	1.56e-12
FBXL16	103.172	2.70915	0.363677	7.44934	9.38e-14	1.58e-12
Z97192.2	17.1817	3.28009	0.440524	7.44588	9.63e-14	1.63e-12
UNC13A	12.5744	2.5345	0.340426	7.44509	9.69e-14	1.63e-12
UGT2B7	27271.1	-1.88115	0.252784	-7.44173	9.94e-14	1.67e-12
AL162582.1	15.6969	4.32241	0.580875	7.4412	9.98e-14	1.68e-12
MAP7D2	60.8983	3.07687	0.413558	7.44001	1.01e-13	1.69e-12
CPED1	1394.78	-1.66519	0.223857	-7.43864	1.02e-13	1.71e-12
ADRA1B	297.756	-1.55799	0.209461	-7.4381	1.02e-13	1.71e-12
ABCA3	319.362	1.72143	0.231548	7.43443	1.05e-13	1.76e-12
TACSTD2	366.57	-2.57343	0.346256	-7.43218	1.07e-13	1.79e-12
GLYATL1P4	26.2239	3.43627	0.462412	7.43117	1.08e-13	1.8e-12
SGK1	3864.27	-1.53009	0.206041	-7.42616	1.12e-13	1.87e-12
HIST2H2BF	14.6195	1.87433	0.252421	7.42542	1.12e-13	1.88e-12
S100A3	11.9264	2.68798	0.362015	7.42505	1.13e-13	1.88e-12
CNR1	29.7958	2.80594	0.377989	7.42335	1.14e-13	1.9e-12
MELTF-AS1	17.5902	1.70633	0.229875	7.42285	1.15e-13	1.91e-12
CD226	112.001	-1.58351	0.21334	-7.42248	1.15e-13	1.91e-12
DCAF8L1	11.8065	8.97612	1.20948	7.42147	1.16e-13	1.92e-12
ITLN1	83.0132	-3.07614	0.414575	-7.41998	1.17e-13	1.94e-12
INPP5J	32.6478	2.07325	0.279439	7.41933	1.18e-13	1.95e-12
PRRG3	7.41585	2.24443	0.302554	7.41828	1.19e-13	1.96e-12
DAND5	3.88812	2.97962	0.40166	7.41826	1.19e-13	1.96e-12
AC124944.2	9.85356	1.60676	0.21676	7.41262	1.24e-13	2.05e-12
AP003469.2	5.24169	4.31411	0.582019	7.41232	1.24e-13	2.05e-12
CHRM2	39.1924	-3.34319	0.451064	-7.41179	1.25e-13	2.06e-12
CPA6	5.73764	4.24025	0.572521	7.40628	1.3e-13	2.14e-12
EDARADD	51.319	2.55907	0.345599	7.40475	1.31e-13	2.17e-12
AGXT2	3719.75	-1.87293	0.253067	-7.40095	1.35e-13	2.23e-12
UGT1A10	20.9839	4.57611	0.61846	7.3992	1.37e-13	2.26e-12
MAGEB1	8.54282	8.3652	1.13183	7.39087	1.46e-13	2.4e-12
EML6	57.6937	1.60611	0.217311	7.39082	1.46e-13	2.4e-12
TM4SF19-AS1	7.20162	1.69879	0.22997	7.387	1.5e-13	2.46e-12
GJA5	247.948	1.6863	0.228284	7.38686	1.5e-13	2.46e-12
ZNF675	116.448	1.59303	0.215667	7.38654	1.51e-13	2.47e-12
DBN1	723.083	1.64472	0.22275	7.38372	1.54e-13	2.51e-12
AC092171.4	5.12269	1.98287	0.268576	7.3829	1.55e-13	2.53e-12
SELENOM	1324.89	2.03994	0.276349	7.38175	1.56e-13	2.55e-12
FITM1	220.961	-2.00536	0.271909	-7.37512	1.64e-13	2.67e-12
ITGAD	85.8946	-2.03149	0.275466	-7.37475	1.65e-13	2.68e-12
LINC02313	4.83475	3.8306	0.519496	7.37369	1.66e-13	2.7e-12
ASNSP1	27.3233	6.98003	0.946778	7.37241	1.68e-13	2.72e-12
SLC22A12	209.022	4.55136	0.617353	7.37238	1.68e-13	2.72e-12
AGTR1	2746.32	-1.50625	0.204387	-7.36959	1.71e-13	2.78e-12
CRHR2	9.98493	1.76262	0.239323	7.36502	1.77e-13	2.87e-12
MSI1	114.166	2.765	0.375944	7.35481	1.91e-13	3.09e-12
AC005077.2	15.334	-2.69759	0.366914	-7.35211	1.95e-13	3.15e-12
SYN3	12.5119	2.01897	0.27463	7.35158	1.96e-13	3.16e-12
ANKRD65	174.76	2.28799	0.311225	7.35155	1.96e-13	3.16e-12
TSPAN5	260.342	2.24483	0.305406	7.35031	1.98e-13	3.18e-12
OACYLP	1.7202	3.23885	0.440715	7.34908	2e-13	3.21e-12
C4orf48	68.215	2.41893	0.32915	7.34904	2e-13	3.21e-12
C21orf62	12.6317	-2.56216	0.348921	-7.3431	2.09e-13	3.35e-12
TMEM132B	15.3823	2.55642	0.348144	7.34299	2.09e-13	3.35e-12
KCNJ13	4.47279	-3.79876	0.517633	-7.33872	2.16e-13	3.45e-12
DNASE1L2	19.6513	2.29499	0.312725	7.33869	2.16e-13	3.45e-12
RBMS3-AS3	3.68215	-2.00172	0.272845	-7.33647	2.19e-13	3.51e-12
FCGR2B	474.773	-2.19314	0.29896	-7.3359	2.2e-13	3.52e-12
DKK4	58.6662	3.86295	0.526745	7.33362	2.24e-13	3.58e-12
ANKFN1	31.2911	6.66621	0.909848	7.32673	2.36e-13	3.75e-12
CACNG4	99.5529	3.60134	0.491759	7.32339	2.42e-13	3.84e-12
GAPLINC	16.6684	2.5246	0.344801	7.3219	2.44e-13	3.88e-12
LINC00528	34.186	1.51494	0.20694	7.32067	2.47e-13	3.91e-12
LINC00355	8.20077	6.07022	0.829192	7.32064	2.47e-13	3.91e-12
MEIS3P2	2.95755	-2.05533	0.280802	-7.31949	2.49e-13	3.94e-12
AC010280.1	6.82631	-2.35078	0.321222	-7.31824	2.51e-13	3.97e-12
ABCB5	11.82	5.11169	0.698796	7.315	2.57e-13	4.07e-12
HAND2	178.1	-2.27493	0.311327	-7.30721	2.73e-13	4.3e-12
SULT4A1	52.4312	4.22651	0.578469	7.30637	2.74e-13	4.33e-12
C8A	21987.7	-1.6287	0.223436	-7.28931	3.12e-13	4.89e-12
U91324.1	92.5754	-1.67402	0.229839	-7.28343	3.25e-13	5.1e-12
ADH4	80030.1	-2.5416	0.348973	-7.2831	3.26e-13	5.11e-12
PHYHIPL	300.252	2.22553	0.30569	7.28036	3.33e-13	5.2e-12
FABP4	269.569	2.3649	0.325157	7.27309	3.51e-13	5.48e-12
GSC	4.60256	4.11145	0.565372	7.27211	3.54e-13	5.52e-12
DUOX1	76.5557	1.85921	0.255723	7.27044	3.58e-13	5.58e-12
GADD45G	5004.5	-1.75428	0.241345	-7.26874	3.63e-13	5.65e-12
ASB9P1	5.53271	2.9145	0.401012	7.26785	3.65e-13	5.68e-12
SKAP1	664.476	-1.6242	0.223493	-7.26737	3.67e-13	5.7e-12
RFLNA	16.5612	2.48011	0.3414	7.26452	3.74e-13	5.81e-12
GLP1R	4.81225	4.86915	0.670924	7.25738	3.95e-13	6.11e-12
FBN3	56.6544	3.36516	0.463734	7.25666	3.97e-13	6.14e-12
AC145343.1	13.7946	1.72889	0.238288	7.25544	4e-13	6.19e-12
AL359878.1	3.24151	2.06915	0.285404	7.24988	4.17e-13	6.44e-12
FHAD1	20.7792	2.05051	0.282846	7.24956	4.18e-13	6.45e-12
DNAH12	23.5011	2.62612	0.362258	7.24932	4.19e-13	6.46e-12
CSPG4P10	24.0418	1.52603	0.210621	7.24542	4.31e-13	6.63e-12
TDGF1	286.869	2.80367	0.387089	7.24297	4.39e-13	6.75e-12
MRO	286.734	-1.81555	0.250689	-7.24226	4.41e-13	6.78e-12
MMP24	144.392	2.04496	0.282509	7.23857	4.53e-13	6.96e-12
PRR7-AS1	3.54043	2.5632	0.354325	7.23404	4.69e-13	7.18e-12
NAPSB	324.376	-1.6638	0.230015	-7.23346	4.71e-13	7.21e-12
LRRC1	214.573	1.90081	0.262828	7.23214	4.75e-13	7.27e-12
DOCK3	13.1089	2.2805	0.315686	7.22396	5.05e-13	7.7e-12
LINC02404	14.0291	6.43217	0.890516	7.22298	5.09e-13	7.75e-12
RDH16	17749.8	-2.1566	0.298767	-7.21831	5.26e-13	8e-12
AC107419.1	4.38891	4.55204	0.630702	7.21742	5.3e-13	8.04e-12
GPR83	11.1077	-1.97643	0.273934	-7.215	5.39e-13	8.18e-12
DPF3	158.934	-1.70117	0.235875	-7.21216	5.51e-13	8.33e-12
ZNF676	21.2245	3.1977	0.443412	7.21157	5.53e-13	8.36e-12
ADH1A	38047.2	-1.92095	0.26638	-7.21131	5.54e-13	8.37e-12
C1QL4	7.21802	3.72765	0.516952	7.21083	5.56e-13	8.4e-12
HAVCR1	14.2373	3.90472	0.541514	7.21075	5.56e-13	8.4e-12
ADGRE4P	14.1128	-1.7254	0.239308	-7.20996	5.6e-13	8.44e-12
RGS20	5.85957	2.91071	0.403738	7.2094	5.62e-13	8.47e-12
LINC00634	1.78299	3.06582	0.425364	7.20754	5.7e-13	8.58e-12
C5orf58	23.3053	3.08331	0.428172	7.2011	5.97e-13	8.97e-12
SAPCD1	6.84017	1.99458	0.277058	7.19915	6.06e-13	9.09e-12
AC145207.9	7.13742	2.09123	0.290697	7.19383	6.3e-13	9.43e-12
KCNH2	49.793	2.95537	0.410839	7.1935	6.32e-13	9.45e-12
FAM83E	9.67246	-2.41048	0.335096	-7.19342	6.32e-13	9.45e-12
CYP4A22	10213	-1.92815	0.268064	-7.19287	6.34e-13	9.48e-12
LINC01549	27.5789	2.99735	0.416711	7.19287	6.34e-13	9.48e-12
APOBEC3A	23.4278	-2.00274	0.278485	-7.19156	6.41e-13	9.56e-12
ZP3	61.5875	1.59759	0.222195	7.19002	6.48e-13	9.67e-12
AC113404.1	9.28754	3.58683	0.498911	7.18931	6.51e-13	9.71e-12
LINC02377	8.32558	5.9708	0.830779	7.18698	6.62e-13	9.87e-12
LNCOC1	12.6016	1.97179	0.274426	7.18516	6.71e-13	9.99e-12
TRIM50	29.2191	2.91254	0.405537	7.18193	6.87e-13	1.02e-11
B3GALT5-AS1	7.37945	-2.92165	0.406815	-7.18179	6.88e-13	1.02e-11
XAGE5	28.283	8.61508	1.19967	7.1812	6.91e-13	1.03e-11
AC092119.2	8.1703	1.67842	0.233754	7.1803	6.96e-13	1.03e-11
FER1L6	13.3468	4.14109	0.576748	7.18007	6.97e-13	1.03e-11
PAGE5	59.5415	2.95287	0.41126	7.18006	6.97e-13	1.03e-11
C12orf56	10.8794	4.16645	0.580921	7.17214	7.38e-13	1.09e-11
TEX45	9.21121	2.58349	0.360227	7.17184	7.4e-13	1.09e-11
ANKRD55	68.7194	-2.04597	0.285305	-7.17118	7.44e-13	1.1e-11
SLC22A4	61.4392	1.76148	0.245708	7.16899	7.56e-13	1.11e-11
IGHV3-66	15.8426	-2.95003	0.411511	-7.16878	7.57e-13	1.12e-11
PTK7	313.93	1.88951	0.263715	7.16497	7.78e-13	1.14e-11
PFKP	889.374	2.35676	0.32901	7.16317	7.88e-13	1.16e-11
DYDC2	33.0753	2.75218	0.384301	7.16152	7.98e-13	1.17e-11
BRINP2	8.50884	-2.22399	0.310603	-7.16024	8.05e-13	1.18e-11
HIST1H2BG	22.546	2.06545	0.288489	7.15955	8.09e-13	1.19e-11
CCDC78	22.8797	2.35698	0.329461	7.15404	8.43e-13	1.23e-11
LINP1	7.11445	-3.17266	0.443517	-7.15342	8.46e-13	1.24e-11
CLVS1	12.2006	2.18041	0.304877	7.15175	8.57e-13	1.25e-11
AKR1B10P1	87.7538	4.22115	0.59023	7.15171	8.57e-13	1.25e-11
ENOX1	31.1083	2.13454	0.298621	7.14797	8.81e-13	1.29e-11
TCF21	81.2422	-1.6	0.22394	-7.14476	9.02e-13	1.31e-11
GLUL	102148	2.27924	0.319087	7.14303	9.13e-13	1.33e-11
AL590708.1	2.71009	2.8189	0.394677	7.1423	9.18e-13	1.34e-11
CST1	13.6901	4.94927	0.693072	7.14106	9.26e-13	1.35e-11
CLCNKA	20.7119	2.53789	0.355413	7.14068	9.29e-13	1.35e-11
AC009275.1	21.3609	2.42452	0.339658	7.13813	9.46e-13	1.37e-11
CACNA2D3	34.532	2.48366	0.34821	7.13264	9.85e-13	1.43e-11
ANKRD33	9.99004	4.1394	0.580461	7.13124	9.95e-13	1.44e-11
LINC00346	77.0175	1.94509	0.272784	7.13052	1e-12	1.45e-11
ZNF252P-AS1	7.56196	1.84461	0.258752	7.12888	1.01e-12	1.46e-11
ATP6V1FNB	13.6996	1.88013	0.263755	7.12834	1.02e-12	1.47e-11
ESR1	1216.35	-2.12074	0.297538	-7.12763	1.02e-12	1.47e-11
AP1M2	464.753	3.15632	0.442851	7.12728	1.02e-12	1.48e-11
SLC17A8	16.4297	-2.75864	0.387197	-7.12465	1.04e-12	1.51e-11
AC139100.2	12.2721	1.55429	0.218404	7.11656	1.11e-12	1.59e-11
IGF2BP2	387.644	2.02533	0.284706	7.11377	1.13e-12	1.62e-11
SOSTDC1	19.0278	3.21735	0.452486	7.11038	1.16e-12	1.66e-11
ADAM11	19.8025	2.08246	0.292999	7.10738	1.18e-12	1.7e-11
PADI4	11.1834	-2.26533	0.318735	-7.10727	1.18e-12	1.7e-11
GRIN2A	60.008	3.80517	0.535582	7.10474	1.21e-12	1.72e-11
FOLH1B	296.959	-2.45464	0.345711	-7.10027	1.25e-12	1.78e-11
INHA	16.8843	2.98049	0.419788	7.09999	1.25e-12	1.78e-11
ADAMTS16	63.958	3.22455	0.454195	7.09948	1.25e-12	1.79e-11
HOXD1	2.58482	4.15378	0.585383	7.09583	1.29e-12	1.83e-11
CYTOR	344.106	1.78054	0.251051	7.09233	1.32e-12	1.88e-11
ELF3-AS1	63.8765	1.65392	0.233434	7.08518	1.39e-12	1.97e-11
ZNF296	29.8166	1.8291	0.258504	7.07573	1.49e-12	2.1e-11
COLEC12	101.332	2.22571	0.314659	7.07342	1.51e-12	2.14e-11
AFM	15128	-1.98632	0.280876	-7.07187	1.53e-12	2.16e-11
LINC02580	15.7598	-1.73389	0.245265	-7.06948	1.56e-12	2.19e-11
AC243960.3	2.83795	-2.14959	0.304235	-7.06558	1.6e-12	2.25e-11
LINC02616	6.21789	5.67035	0.802569	7.06525	1.6e-12	2.26e-11
PRKAA2	455.063	2.17965	0.308511	7.06505	1.61e-12	2.26e-11
AC012236.1	40.986	2.41019	0.34118	7.06427	1.61e-12	2.27e-11
SOX11	5.81673	3.80027	0.537975	7.06403	1.62e-12	2.27e-11
STOX1	48.9511	2.28297	0.323215	7.06332	1.63e-12	2.28e-11
SPRED3	14.2701	1.67368	0.237002	7.06187	1.64e-12	2.3e-11
LINC00628	3.04644	2.86221	0.405358	7.06094	1.65e-12	2.32e-11
LINC01970	3.62649	2.3885	0.338321	7.05985	1.67e-12	2.34e-11
AC005041.3	13.3254	1.60454	0.22729	7.05946	1.67e-12	2.34e-11
MYBPC1	7.75092	2.6941	0.381866	7.0551	1.72e-12	2.41e-11
ZSCAN31	473.649	1.74602	0.247539	7.05355	1.74e-12	2.44e-11
NRCAM	421.114	3.03621	0.430512	7.05257	1.76e-12	2.45e-11
CGREF1	729.627	1.95333	0.276973	7.05243	1.76e-12	2.45e-11
PAGE2	24.7381	7.51213	1.06521	7.05224	1.76e-12	2.45e-11
SPECC1	293.717	1.8775	0.266229	7.0522	1.76e-12	2.45e-11
LINC00607	34.5919	2.52355	0.357849	7.052	1.76e-12	2.46e-11
MYMX	6.43614	2.4042	0.341083	7.04872	1.81e-12	2.51e-11
AC020904.2	11.5758	1.72293	0.244439	7.04853	1.81e-12	2.52e-11
MT1DP	144.374	-2.6266	0.373116	-7.03963	1.93e-12	2.67e-11
AL391056.1	16.9594	3.16198	0.449301	7.03755	1.96e-12	2.71e-11
DMC1	11.9295	2.32724	0.330843	7.03429	2e-12	2.77e-11
RGSL1	82.1516	3.66422	0.521053	7.03235	2.03e-12	2.8e-11
LINC01767	424.834	-1.84217	0.262071	-7.02927	2.08e-12	2.87e-11
HIST2H2BD	2.61608	2.57624	0.36652	7.02892	2.08e-12	2.87e-11
PTH2R	161.88	3.93512	0.559848	7.02892	2.08e-12	2.87e-11
TMPRSS15	14.5513	6.4246	0.914135	7.02806	2.09e-12	2.89e-11
HES2	16.4372	2.67311	0.380702	7.02154	2.19e-12	3.02e-11
SHC3	31.737	1.75091	0.24938	7.02105	2.2e-12	3.03e-11
AC004160.1	83.0324	-2.19264	0.31238	-7.01913	2.23e-12	3.06e-11
CEL	15.9328	2.12641	0.303142	7.01457	2.31e-12	3.16e-11
AC099521.2	2.2721	-2.52651	0.360361	-7.01104	2.37e-12	3.24e-11
PF4	8.48494	-2.25238	0.321509	-7.00565	2.46e-12	3.36e-11
AC012146.1	91.1659	1.62549	0.232053	7.00483	2.47e-12	3.37e-11
SLC30A2	121.243	3.44148	0.491323	7.00451	2.48e-12	3.38e-11
AC080080.1	5.77175	1.86439	0.266203	7.00365	2.49e-12	3.4e-11
NRG3	18.7595	-2.1179	0.302448	-7.00254	2.51e-12	3.42e-11
CCL3	306.153	-1.68791	0.241292	-6.99528	2.65e-12	3.59e-11
HBA1	13.6646	-2.39533	0.342474	-6.99421	2.67e-12	3.62e-11
AC007277.1	5.62771	3.36744	0.481487	6.99384	2.67e-12	3.63e-11
KBTBD11	702.733	-2.08947	0.29877	-6.99357	2.68e-12	3.63e-11
COL25A1	42.3352	-2.24967	0.321756	-6.99186	2.71e-12	3.67e-11
RGS9BP	2.09527	2.67114	0.38207	6.99124	2.72e-12	3.69e-11
C5orf30	117.578	1.97834	0.283241	6.98463	2.86e-12	3.86e-11
AL355802.3	9.00031	1.63692	0.234551	6.97893	2.97e-12	4.01e-11
CCR1	360.948	-1.5584	0.223363	-6.97701	3.02e-12	4.06e-11
FIGNL2-DT	3.69573	2.22298	0.319034	6.96784	3.22e-12	4.33e-11
RASGRF1	29.7527	2.61572	0.375561	6.96483	3.29e-12	4.42e-11
HERC5	682.818	-1.64182	0.235885	-6.96028	3.4e-12	4.56e-11
AC100849.1	3.52157	-1.94587	0.279605	-6.95936	3.42e-12	4.58e-11
AC147055.1	11.1057	2.37001	0.34055	6.95935	3.42e-12	4.58e-11
CABP1	11.5823	2.24134	0.322067	6.95923	3.42e-12	4.59e-11
TDRKH-AS1	8.37886	1.5502	0.222757	6.95913	3.42e-12	4.59e-11
LINC02588	3.81363	4.82522	0.693426	6.95853	3.44e-12	4.61e-11
AC141002.1	2.6888	2.40617	0.345799	6.95827	3.44e-12	4.61e-11
IGFALS	5941.73	-2.67481	0.38456	-6.95551	3.51e-12	4.7e-11
NPY5R	14.8638	-1.91831	0.276041	-6.94937	3.67e-12	4.9e-11
TMEM154	259.039	-2.18274	0.314116	-6.94882	3.68e-12	4.92e-11
FCGR3B	57.5348	-1.80185	0.259396	-6.94631	3.75e-12	5e-11
C7	8297.82	-2.15969	0.311078	-6.94258	3.85e-12	5.13e-11
AC105118.1	5.86376	5.58018	0.803863	6.94171	3.87e-12	5.15e-11
NR4A2	847.616	-1.91241	0.275511	-6.94132	3.88e-12	5.17e-11
GCNT1P3	2.16439	-2.85353	0.411835	-6.92881	4.24e-12	5.63e-11
C3orf67-AS1	2.54466	3.32683	0.480328	6.92615	4.32e-12	5.73e-11
PRSS56	19.1249	6.64634	0.959993	6.92332	4.41e-12	5.83e-11
INAVA	202.801	2.62248	0.378805	6.92304	4.42e-12	5.84e-11
KIF21B	346.986	1.67909	0.242556	6.92247	4.44e-12	5.86e-11
REN	95.7523	2.6017	0.375983	6.91972	4.53e-12	5.97e-11
STK24-AS1	7.36293	1.65394	0.2391	6.91738	4.6e-12	6.06e-11
KIRREL2	5.10369	3.77376	0.545661	6.91594	4.65e-12	6.12e-11
CCL4	333.418	-1.60316	0.231877	-6.91383	4.72e-12	6.21e-11
GAL3ST1	465.921	2.57758	0.372881	6.9126	4.76e-12	6.26e-11
AL358075.2	2.39588	2.94002	0.425326	6.91239	4.77e-12	6.27e-11
CHGA	3.79596	3.30276	0.477885	6.91121	4.81e-12	6.32e-11
IGF2BP2-AS1	5.71641	3.65563	0.52899	6.91057	4.83e-12	6.34e-11
CDH17	28.5256	3.71041	0.537088	6.90838	4.9e-12	6.44e-11
PPIAP77	8.95376	2.25466	0.326372	6.90826	4.91e-12	6.44e-11
MYEF2	91.7673	2.5096	0.363399	6.9059	4.99e-12	6.54e-11
AC010615.2	14.942	2.45271	0.355344	6.90235	5.11e-12	6.68e-11
AL354798.1	31.27	3.24182	0.469912	6.8988	5.24e-12	6.84e-11
S100A12	28.0261	-2.35382	0.341277	-6.8971	5.31e-12	6.92e-11
BHLHE40-AS1	31.9748	1.97945	0.287007	6.89686	5.32e-12	6.93e-11
GRIN2B	94.3012	-2.542	0.368626	-6.89589	5.35e-12	6.97e-11
AP000439.2	7.31151	-2.44299	0.354296	-6.89534	5.37e-12	6.99e-11
HIST1H1C	4897.06	1.59848	0.231946	6.89163	5.52e-12	7.16e-11
CLIC5	121.958	1.79412	0.26048	6.88775	5.67e-12	7.35e-11
SERPINA11	16182.7	-1.93561	0.281089	-6.88613	5.73e-12	7.43e-11
AC012313.8	7.4213	1.60324	0.232913	6.88343	5.84e-12	7.56e-11
BAALC-AS1	17.1265	1.56406	0.227227	6.88323	5.85e-12	7.57e-11
AP000593.3	5.52849	3.59484	0.522344	6.88213	5.9e-12	7.62e-11
LINC02709	11.5831	1.54296	0.224443	6.87464	6.21e-12	8.02e-11
KCNK17	56.7764	-1.83111	0.266492	-6.87119	6.37e-12	8.21e-11
AL691420.1	8.99659	6.32086	0.919916	6.87113	6.37e-12	8.21e-11
LINC01608	8.83124	5.7002	0.829972	6.86795	6.51e-12	8.39e-11
AC107959.3	10.4694	2.25173	0.32789	6.86735	6.54e-12	8.41e-11
SLC22A1	27760.9	-2.47855	0.361043	-6.86496	6.65e-12	8.55e-11
FAM183DP	3.19608	-2.9907	0.435794	-6.86264	6.76e-12	8.68e-11
CASKIN1	4.8275	3.01022	0.438662	6.86229	6.78e-12	8.7e-11
CACNA1S	3.25752	2.6949	0.392775	6.86119	6.83e-12	8.76e-11
RHO	2.30142	3.27592	0.477471	6.86098	6.84e-12	8.77e-11
PPP1R3B	7229.01	-1.50007	0.218678	-6.85971	6.9e-12	8.84e-11
TSLP	247.871	-1.93555	0.28222	-6.85831	6.97e-12	8.92e-11
BDKRB2	276.58	2.10921	0.307542	6.85829	6.97e-12	8.92e-11
SPSB4	18.5742	-2.44114	0.356266	-6.85201	7.28e-12	9.29e-11
C2CD4D	9.7105	1.551	0.226394	6.85087	7.34e-12	9.35e-11
RALYL	7.2677	-2.24456	0.327632	-6.85085	7.34e-12	9.35e-11
AP005057.1	7.11032	4.05473	0.592111	6.84793	7.49e-12	9.53e-11
TRAM1L1	16.9893	2.50617	0.366127	6.84508	7.64e-12	9.72e-11
ATP6V0E2-AS1	33.6884	1.62959	0.238083	6.84462	7.67e-12	9.75e-11
SOCS3	4495.76	-2.09637	0.306489	-6.83993	7.92e-12	1.01e-10
PDGFRL	52.7961	1.64823	0.241055	6.83757	8.05e-12	1.02e-10
PCDHA1	8.09852	3.79349	0.554877	6.83662	8.11e-12	1.03e-10
DHDH	16.4045	2.20102	0.322247	6.83022	8.48e-12	1.07e-10
CALN1	22.1782	-2.77788	0.406727	-6.82985	8.5e-12	1.08e-10
LINC01818	9.74664	-2.24526	0.328753	-6.82962	8.51e-12	1.08e-10
PLPP2	835.534	2.57124	0.376646	6.82668	8.69e-12	1.1e-10
UBE2DNL	2.41012	-4.02279	0.589519	-6.82385	8.86e-12	1.12e-10
AC098934.1	148.314	1.7308	0.253657	6.82337	8.89e-12	1.12e-10
SRD5A2	2205.94	-2.11326	0.309801	-6.82134	9.02e-12	1.14e-10
MSL3P1	17.9611	1.52981	0.224388	6.81769	9.25e-12	1.16e-10
ZNF208	16.0038	2.56772	0.376786	6.81478	9.44e-12	1.19e-10
POLN	70.3953	1.55683	0.228462	6.81438	9.47e-12	1.19e-10
AC139100.1	15.9157	1.59406	0.233965	6.81324	9.54e-12	1.2e-10
SBK3	12.6814	3.67183	0.539468	6.80638	1e-11	1.26e-10
PAK3	63.8285	2.82734	0.41562	6.80269	1.03e-11	1.29e-10
DUSP5	1582.21	-1.54537	0.227232	-6.80087	1.04e-11	1.3e-10
ZNF738	37.8978	1.55501	0.228682	6.79988	1.05e-11	1.31e-10
ERBB4	4.14132	-2.28536	0.336184	-6.79794	1.06e-11	1.33e-10
TNXB	590.786	-1.58673	0.233667	-6.79054	1.12e-11	1.39e-10
DPY19L2P2	12.4927	1.95923	0.288615	6.78841	1.13e-11	1.41e-10
ZNF536	1.34018	-2.698	0.397605	-6.78564	1.16e-11	1.44e-10
AL162413.1	7.68029	5.85592	0.863402	6.78238	1.18e-11	1.47e-10
AC007639.1	7.12517	4.04329	0.596169	6.78213	1.18e-11	1.47e-10
PPP1R14B-AS1	25.1016	1.70179	0.251194	6.77481	1.25e-11	1.55e-10
THBS1	9182.45	-1.7067	0.251971	-6.77343	1.26e-11	1.56e-10
PRAMEF4	15.8091	4.74624	0.700717	6.77341	1.26e-11	1.56e-10
POU5F1	43.7966	1.62814	0.240406	6.77247	1.27e-11	1.57e-10
UCHL1	69.3474	2.32488	0.34332	6.77176	1.27e-11	1.58e-10
SBSPON	72.7026	2.03808	0.301102	6.76875	1.3e-11	1.61e-10
ZCCHC12	10.1596	3.94485	0.582977	6.76672	1.32e-11	1.63e-10
AC098934.2	38.5178	1.96522	0.290429	6.76663	1.32e-11	1.63e-10
FLVCR1-DT	93.6875	1.5711	0.23231	6.76294	1.35e-11	1.67e-10
SSTR5	15.2737	5.36198	0.793034	6.76135	1.37e-11	1.69e-10
TSSK5P	6.83175	2.18445	0.323139	6.76012	1.38e-11	1.7e-10
FAM24B	12.3233	1.76303	0.260807	6.75991	1.38e-11	1.7e-10
PLIN2	28942.2	-1.51103	0.223592	-6.75798	1.4e-11	1.72e-10
GYS2	5051.09	-2.10327	0.311311	-6.75617	1.42e-11	1.74e-10
LINC01726	2.3738	-3.03751	0.449853	-6.75222	1.46e-11	1.79e-10
GABRA3	19.5177	5.92302	0.877244	6.75185	1.46e-11	1.79e-10
MYBPHL	5.10619	4.20109	0.622283	6.7511	1.47e-11	1.8e-10
LRRC4C	32.2	-1.79962	0.266682	-6.74817	1.5e-11	1.84e-10
AC114401.1	2.48458	3.89922	0.577877	6.74749	1.5e-11	1.84e-10
LINC01151	49.8712	2.46507	0.365727	6.7402	1.58e-11	1.94e-10
TYRO3	315.115	1.87351	0.278095	6.73696	1.62e-11	1.98e-10
EPHA10	22.3037	3.03957	0.451199	6.73666	1.62e-11	1.98e-10
PCDH9	142.253	-2.02262	0.300374	-6.73367	1.65e-11	2.02e-10
AC108463.1	5.60807	1.58717	0.235737	6.7328	1.66e-11	2.03e-10
MT1H	4436.32	-3.53625	0.525439	-6.73009	1.7e-11	2.07e-10
C9	44912.1	-2.70884	0.402514	-6.72981	1.7e-11	2.07e-10
SLC25A47	17786.9	-2.55018	0.379115	-6.72665	1.74e-11	2.11e-10
LINC01194	12.8402	6.71693	0.998755	6.7253	1.75e-11	2.13e-10
ZNF648	44.7452	2.48767	0.3699	6.72526	1.75e-11	2.13e-10
MPPED2	44.8944	1.58496	0.235701	6.72446	1.76e-11	2.14e-10
CERNA1	25.7944	2.21812	0.329904	6.72354	1.77e-11	2.15e-10
AC091987.1	4.12234	5.1352	0.763893	6.7224	1.79e-11	2.17e-10
CLC	1.36391	-2.89438	0.430636	-6.72117	1.8e-11	2.19e-10
CR1	98.8227	-2.03911	0.30355	-6.71755	1.85e-11	2.24e-10
HIST3H2BB	7.15874	3.41013	0.507863	6.71466	1.89e-11	2.28e-10
FUT2	34.8127	1.89331	0.282015	6.71352	1.9e-11	2.3e-10
CPNE7	69.1721	2.47695	0.368991	6.71277	1.91e-11	2.31e-10
AL163953.1	4.44594	3.3574	0.50017	6.71251	1.91e-11	2.31e-10
AC016596.1	8.89306	1.77497	0.264444	6.71208	1.92e-11	2.32e-10
AL445437.1	15.931	2.56946	0.382933	6.70995	1.95e-11	2.35e-10
SPOCD1	13.3061	2.23442	0.333028	6.70941	1.95e-11	2.36e-10
AP006296.1	3.08287	-1.6539	0.246524	-6.7089	1.96e-11	2.37e-10
AC016773.1	6.5527	1.69875	0.253264	6.70745	1.98e-11	2.39e-10
IGHA2	930.584	-2.4978	0.372428	-6.70681	1.99e-11	2.4e-10
AC091133.5	2.40882	3.92055	0.584598	6.7064	1.99e-11	2.4e-10
HOXA11-AS	3.92637	4.87363	0.726843	6.7052	2.01e-11	2.42e-10
PLCB1	451.865	1.52768	0.227879	6.70394	2.03e-11	2.44e-10
RPRML	7.10955	3.70819	0.553196	6.7032	2.04e-11	2.45e-10
CCL25	36.7459	2.70866	0.404177	6.70168	2.06e-11	2.48e-10
PCDHB8	16.945	2.76257	0.412242	6.70133	2.07e-11	2.48e-10
AC092117.1	16.5424	1.52479	0.227573	6.70023	2.08e-11	2.5e-10
PTGFR	234.068	2.442	0.364568	6.69833	2.11e-11	2.52e-10
VCX	3.83508	4.78402	0.71422	6.69825	2.11e-11	2.53e-10
NKX3-2	4.14482	4.2132	0.629055	6.69766	2.12e-11	2.53e-10
DBNDD1	1121.99	1.76032	0.262888	6.69608	2.14e-11	2.56e-10
MAP2	745.141	1.8175	0.271652	6.69055	2.22e-11	2.66e-10
AC011462.4	4.74068	1.59315	0.238135	6.6901	2.23e-11	2.66e-10
AC233296.1	11.3922	2.86537	0.428309	6.68996	2.23e-11	2.66e-10
ZEB2P1	3.32545	4.14521	0.619646	6.68964	2.24e-11	2.67e-10
AC022424.1	12.0818	5.53117	0.82732	6.68565	2.3e-11	2.74e-10
AC006277.1	7.85851	1.5746	0.235745	6.67923	2.4e-11	2.86e-10
BX842568.2	87.1569	-1.73314	0.259554	-6.67736	2.43e-11	2.89e-10
PAK5	7.25408	-2.59978	0.389542	-6.67395	2.49e-11	2.96e-10
AP006222.1	8.36701	2.24929	0.337103	6.67242	2.52e-11	2.98e-10
MIR217HG	6.88624	4.09541	0.613912	6.671	2.54e-11	3.01e-10
FXYD1	1786.17	-2.20534	0.330695	-6.66882	2.58e-11	3.05e-10
SMPX	24.7658	3.13987	0.47083	6.66881	2.58e-11	3.05e-10
ATP5MC1P4	3.29039	2.32063	0.348146	6.66567	2.63e-11	3.11e-10
HAS2	71.045	-2.2501	0.337575	-6.66548	2.64e-11	3.12e-10
LHX2	101.711	-1.7196	0.258119	-6.66205	2.7e-11	3.19e-10
CD300E	79.8192	-1.66234	0.249568	-6.66088	2.72e-11	3.21e-10
AL118511.2	3.40085	3.66753	0.550721	6.65951	2.75e-11	3.24e-10
SIGLEC16	42.8229	-1.66359	0.249808	-6.65949	2.75e-11	3.24e-10
TMPOP2	1.68168	2.83771	0.426514	6.65327	2.87e-11	3.37e-10
VLDLR	341.419	2.23167	0.335661	6.6486	2.96e-11	3.48e-10
AC145207.8	7.27165	2.94936	0.443703	6.64715	2.99e-11	3.51e-10
SH2D4B	2.70553	3.29246	0.495899	6.63937	3.15e-11	3.69e-10
HIST1H1PS1	3.34206	2.68999	0.405379	6.63576	3.23e-11	3.78e-10
HAO2	6686.97	-2.40241	0.362143	-6.63387	3.27e-11	3.82e-10
CCL14	298.172	-1.55585	0.23455	-6.63332	3.28e-11	3.84e-10
AC138356.1	74.7348	-1.74772	0.263629	-6.62945	3.37e-11	3.93e-10
IGDCC4	21.2446	2.42125	0.365253	6.62895	3.38e-11	3.95e-10
PCDH19	13.1323	-1.61204	0.243211	-6.62815	3.4e-11	3.97e-10
LINC01121	2.82427	3.6547	0.551504	6.62678	3.43e-11	4e-10
BTNL8	80.0648	2.82718	0.426666	6.62622	3.44e-11	4.01e-10
FAM83F	132.75	-2.52412	0.381161	-6.62218	3.54e-11	4.12e-10
PDZRN4	26.7659	-2.24998	0.339794	-6.6216	3.55e-11	4.13e-10
MYO3A	5.62947	-2.51874	0.380614	-6.61759	3.65e-11	4.24e-10
LINC01719	35.68	1.57007	0.237274	6.6171	3.66e-11	4.25e-10
AC008080.1	2.28228	-2.29497	0.34689	-6.61584	3.69e-11	4.28e-10
AP001178.3	1.75706	2.85858	0.432137	6.61499	3.72e-11	4.31e-10
JCHAIN	1578.58	-2.43713	0.368609	-6.61168	3.8e-11	4.4e-10
ODF3L1	39.8156	-1.89076	0.285984	-6.61142	3.81e-11	4.4e-10
BAGE2	12.0025	6.56066	0.992452	6.61056	3.83e-11	4.43e-10
KISS1	72.2435	1.91275	0.289441	6.60841	3.88e-11	4.49e-10
AC040970.1	18.5072	2.53844	0.384193	6.60719	3.92e-11	4.52e-10
TCEAL2	5.08932	-2.2506	0.340636	-6.60705	3.92e-11	4.52e-10
BEND3P2	1.16024	-3.02099	0.457388	-6.60487	3.98e-11	4.58e-10
LINC02826	8.61184	4.52039	0.684475	6.60417	4e-11	4.6e-10
AC108751.4	11.6184	1.93505	0.293018	6.60388	4.01e-11	4.61e-10
HAO2-IT1	11.016	-2.34748	0.355574	-6.60196	4.06e-11	4.67e-10
AC096577.1	3.77186	-4.46059	0.676009	-6.59842	4.16e-11	4.78e-10
AP000553.2	1.98947	2.70595	0.410227	6.59621	4.22e-11	4.85e-10
PAQR5	403.391	2.2047	0.334268	6.59562	4.23e-11	4.86e-10
AL355612.1	1.54599	-2.92091	0.442975	-6.59385	4.29e-11	4.91e-10
RMST	7.19869	3.40434	0.516291	6.59384	4.29e-11	4.91e-10
AC138696.2	17.0712	1.54796	0.234877	6.59051	4.38e-11	5.02e-10
LAMB4	5.81965	1.71007	0.259484	6.59027	4.39e-11	5.03e-10
AC016550.2	3.3996	4.86177	0.737896	6.5887	4.44e-11	5.07e-10
CYP39A1	2176.26	-2.11176	0.320562	-6.5877	4.47e-11	5.1e-10
DLX6-AS1	8.40944	5.1172	0.777131	6.58473	4.56e-11	5.2e-10
LINC00685	6.96249	1.60986	0.244545	6.58311	4.61e-11	5.25e-10
AC022167.4	14.1899	-2.45838	0.373519	-6.58168	4.65e-11	5.3e-10
LTK	93.8131	-1.77215	0.269277	-6.58116	4.67e-11	5.32e-10
AL139130.1	3.04164	3.79779	0.577077	6.58108	4.67e-11	5.32e-10
DRP2	2.68833	3.52633	0.536045	6.57842	4.75e-11	5.41e-10
LRRC77P	4.40604	2.31368	0.352096	6.57116	4.99e-11	5.67e-10
AL024498.1	3.41241	2.06087	0.313753	6.56845	5.08e-11	5.77e-10
SQLE	3044.76	1.78126	0.271231	6.56732	5.12e-11	5.81e-10
SERTAD4-AS1	9.51308	2.17645	0.331648	6.56252	5.29e-11	5.99e-10
AXIN2	317.814	2.10751	0.32119	6.56157	5.32e-11	6.02e-10
PGLYRP1	4.55653	-2.15673	0.328721	-6.56096	5.35e-11	6.05e-10
MUC15	27.1958	4.94925	0.754491	6.55971	5.39e-11	6.09e-10
AL591848.2	1.79333	3.26232	0.497456	6.55801	5.45e-11	6.16e-10
AC080100.1	4.01221	-2.24035	0.341769	-6.55514	5.56e-11	6.27e-10
LINC02055	25.0086	3.6258	0.553223	6.55395	5.6e-11	6.32e-10
HEXA-AS1	7.79161	1.6843	0.256994	6.55384	5.61e-11	6.33e-10
HIST1H3E	18.0744	1.61987	0.247256	6.55137	5.7e-11	6.43e-10
SYT3	14.0645	2.67721	0.408791	6.5491	5.79e-11	6.52e-10
OSR1	48.316	2.18579	0.333963	6.54501	5.95e-11	6.69e-10
SLC30A3	9.02488	2.27208	0.347318	6.54178	6.08e-11	6.83e-10
GLB1L3	11.4526	3.59333	0.549304	6.5416	6.09e-11	6.84e-10
IGHV3-53	42.3568	-2.57617	0.393879	-6.54052	6.13e-11	6.88e-10
DTNA	546.268	1.87113	0.286106	6.53998	6.15e-11	6.9e-10
AC012636.1	15.6553	1.53637	0.234958	6.53893	6.2e-11	6.95e-10
AC006065.4	5.64411	5.04417	0.771597	6.53731	6.26e-11	7.02e-10
HIST1H2AD	9.95347	2.01261	0.307883	6.53695	6.28e-11	7.04e-10
AC010643.1	42.5227	2.32358	0.355542	6.53534	6.35e-11	7.11e-10
ADAM21	7.36255	2.01941	0.309105	6.53308	6.44e-11	7.21e-10
EXTL1	7.35827	2.55225	0.390883	6.52945	6.6e-11	7.38e-10
AC106820.5	4.12281	2.35056	0.360162	6.52641	6.74e-11	7.52e-10
LINC00944	17.203	2.67261	0.40973	6.52287	6.9e-11	7.69e-10
BPIFB2	160.888	3.48977	0.535153	6.52107	6.98e-11	7.78e-10
MCCD1	13.396	4.34624	0.666594	6.52007	7.03e-11	7.83e-10
KLK11	16.3201	-2.91602	0.447305	-6.51909	7.07e-11	7.88e-10
AL035446.1	19.1999	2.68451	0.412161	6.51326	7.35e-11	8.18e-10
AP006285.1	16.164	-2.32073	0.356391	-6.51176	7.43e-11	8.25e-10
MAEL	28.5927	2.58819	0.397508	6.51104	7.46e-11	8.29e-10
STRA6	14.7749	3.21743	0.494332	6.50864	7.58e-11	8.42e-10
NR0B1	20.4467	7.12525	1.09566	6.50316	7.86e-11	8.71e-10
PLK3	600.651	-1.5205	0.233851	-6.502	7.93e-11	8.78e-10
TMEM40	24.1237	2.84779	0.438253	6.49805	8.14e-11	9e-10
SAA2	46736.9	-3.31897	0.510964	-6.49551	8.28e-11	9.15e-10
AC013731.1	5.36066	1.50739	0.23207	6.49541	8.28e-11	9.15e-10
MFAP3L	1960.75	-1.56332	0.240718	-6.49441	8.34e-11	9.21e-10
YWHAEP1	3.92633	3.74494	0.576742	6.49326	8.4e-11	9.27e-10
TTC36	2520.19	-2.49009	0.383545	-6.4923	8.45e-11	9.33e-10
LINC00648	10.1141	5.29819	0.816242	6.49095	8.53e-11	9.41e-10
KREMEN2	10.8761	2.33361	0.35971	6.48748	8.73e-11	9.61e-10
CALML3	23.0621	-2.55176	0.393426	-6.486	8.81e-11	9.7e-10
KCNC1	2.36089	3.41688	0.52697	6.484	8.93e-11	9.82e-10
SAA4	9262.43	-1.85208	0.285654	-6.48366	8.95e-11	9.84e-10
ZNF781	25.7275	1.68539	0.259968	6.48305	8.99e-11	9.88e-10
TMEM132A	244.032	1.70527	0.263108	6.48127	9.1e-11	9.98e-10
FEZF1	4.96111	4.79403	0.740137	6.47721	9.34e-11	1.02e-09
ANKRD45	11.6898	2.22468	0.343516	6.4762	9.41e-11	1.03e-09
RNF126P1	4.64768	2.54652	0.39323	6.47589	9.43e-11	1.03e-09
ZNF703	554.09	1.55331	0.239911	6.47454	9.51e-11	1.04e-09
DCAF8L2	15.7972	7.01669	1.08401	6.47293	9.61e-11	1.05e-09
ABCA8	1926.18	-1.61902	0.250135	-6.47257	9.64e-11	1.05e-09
FAM163B	94.3302	-2.46215	0.380447	-6.47174	9.69e-11	1.06e-09
AC092384.2	73.8841	-2.51942	0.389332	-6.47113	9.73e-11	1.06e-09
AC092506.1	4.37532	2.97623	0.460051	6.46935	9.84e-11	1.07e-09
SCGN	404.146	2.29502	0.354787	6.4687	9.88e-11	1.08e-09
SLC12A5-AS1	11.084	2.59698	0.401592	6.46673	1e-10	1.09e-09
CD1D	509.547	-1.52255	0.235576	-6.46309	1.03e-10	1.11e-09
ABCC4	388.133	1.72282	0.266565	6.46305	1.03e-10	1.11e-09
AL121832.3	6.21173	1.65569	0.256228	6.46179	1.03e-10	1.12e-09
AC010547.2	35.7425	-2.75607	0.426974	-6.45488	1.08e-10	1.17e-09
SORT1	1880.21	1.50642	0.233388	6.45458	1.09e-10	1.17e-09
AC112484.3	12.4273	1.62098	0.251224	6.45233	1.1e-10	1.19e-09
AL133215.2	2.64991	1.95012	0.302352	6.44981	1.12e-10	1.21e-09
MST1R	128.434	2.30699	0.357716	6.44921	1.12e-10	1.21e-09
AC010201.2	7.2377	1.505	0.233585	6.44306	1.17e-10	1.26e-09
COLCA1	74.7212	1.70248	0.264388	6.43934	1.2e-10	1.29e-09
MOGAT2	3518.99	-2.18162	0.338803	-6.43921	1.2e-10	1.29e-09
FFAR2	25.5734	-1.67986	0.260913	-6.4384	1.21e-10	1.3e-09
AL031777.1	9.98138	2.23224	0.346746	6.43766	1.21e-10	1.31e-09
PCDHB11	42.4635	2.09247	0.325054	6.43729	1.22e-10	1.31e-09
ROS1	17.1516	3.07558	0.477893	6.4357	1.23e-10	1.32e-09
VWDE	8.51535	-2.74103	0.426082	-6.43312	1.25e-10	1.34e-09
CCDC26	2.46494	-2.15897	0.335757	-6.43017	1.27e-10	1.37e-09
SLC22A15	120.618	2.0388	0.31721	6.42729	1.3e-10	1.39e-09
TMEM150B	244.688	1.94786	0.303063	6.42723	1.3e-10	1.39e-09
PRR18	280.179	-1.52212	0.236833	-6.42697	1.3e-10	1.39e-09
FAM180A	239.356	-2.2253	0.346349	-6.42503	1.32e-10	1.41e-09
CYCSP6	2.92342	4.32324	0.673683	6.41733	1.39e-10	1.48e-09
AL731684.1	3.00154	4.17551	0.650716	6.41679	1.39e-10	1.48e-09
IGLV7-43	33.8065	-2.5058	0.390748	-6.41283	1.43e-10	1.52e-09
AL132780.5	3.72819	1.57428	0.245555	6.41114	1.44e-10	1.53e-09
AL392089.1	3.53607	-2.2273	0.347431	-6.41077	1.45e-10	1.53e-09
AC112178.1	5.35616	5.39072	0.841223	6.40819	1.47e-10	1.56e-09
ADAM22	47.2635	1.82534	0.284903	6.40689	1.49e-10	1.57e-09
OXCT1	177.547	1.96901	0.307375	6.40591	1.49e-10	1.58e-09
LINC00668	7.59785	4.83326	0.755432	6.398	1.57e-10	1.66e-09
MIR2052HG	2.53853	3.86592	0.604369	6.39662	1.59e-10	1.68e-09
RNF157-AS1	16.548	2.50347	0.391491	6.3947	1.61e-10	1.69e-09
RSPH14	13.4558	1.86238	0.29134	6.39247	1.63e-10	1.72e-09
AC134312.6	2.64646	-2.42811	0.379972	-6.39024	1.66e-10	1.74e-09
KCNH4	9.46674	1.71973	0.269295	6.38603	1.7e-10	1.79e-09
AL035401.1	2.69019	4.39786	0.688762	6.38517	1.71e-10	1.8e-09
BMP4	326.777	1.69455	0.265424	6.38431	1.72e-10	1.81e-09
ULK4	283.26	1.6112	0.25253	6.38023	1.77e-10	1.85e-09
ENO3	2869.8	-1.86211	0.291937	-6.37847	1.79e-10	1.87e-09
SERHL	12.9043	1.68937	0.264956	6.37605	1.82e-10	1.9e-09
CYP4F29P	4.31927	-2.13955	0.335561	-6.37604	1.82e-10	1.9e-09
IL17D	29.1377	1.91935	0.301036	6.37582	1.82e-10	1.9e-09
PSCA	7.81325	3.30589	0.518521	6.37561	1.82e-10	1.91e-09
MFSD2A	5770.42	-2.29283	0.359642	-6.37531	1.83e-10	1.91e-09
AL117329.1	3.4438	4.74968	0.745041	6.37506	1.83e-10	1.91e-09
SULT2B1	64.072	2.89232	0.453728	6.37457	1.83e-10	1.91e-09
DKK3	1409.43	1.92222	0.301709	6.37111	1.88e-10	1.96e-09
SPATC1	10.6263	1.60657	0.252186	6.37059	1.88e-10	1.96e-09
AL731556.1	1.84132	2.93045	0.460004	6.37049	1.88e-10	1.96e-09
AP000525.1	4.25637	2.89487	0.454643	6.36734	1.92e-10	2e-09
DPPA2P4	0.884272	-2.91518	0.458306	-6.36076	2.01e-10	2.08e-09
AGBL4	27.9912	-2.35886	0.370931	-6.35928	2.03e-10	2.1e-09
AC006538.1	6.22658	1.6476	0.259094	6.35909	2.03e-10	2.1e-09
IGHA1	10007.7	-2.41954	0.380518	-6.35854	2.04e-10	2.11e-09
PLP1	12.1638	-2.79658	0.439871	-6.35772	2.05e-10	2.12e-09
HP	897110	-1.75912	0.276978	-6.35113	2.14e-10	2.21e-09
AC009063.3	0.70366	-2.90185	0.456916	-6.35095	2.14e-10	2.21e-09
TMEM26-AS1	2.82072	-2.17221	0.342034	-6.35087	2.14e-10	2.21e-09
AC108463.2	2.78759	1.71038	0.269344	6.35017	2.15e-10	2.22e-09
PCDHB10	23.7891	1.60996	0.25359	6.34867	2.17e-10	2.24e-09
TMEM132E	48.2807	-1.61505	0.254512	-6.34565	2.21e-10	2.28e-09
BBOX1	1320.97	-2.03226	0.320289	-6.34509	2.22e-10	2.29e-09
PTGIS	492.629	-1.90296	0.29995	-6.34426	2.23e-10	2.3e-09
AC018553.1	21.8205	2.67731	0.422106	6.34273	2.26e-10	2.32e-09
VCAN	999.867	1.956	0.308397	6.34247	2.26e-10	2.32e-09
SLC52A3	65.0326	1.86429	0.294077	6.33945	2.31e-10	2.36e-09
SELP	155.089	-1.66564	0.262784	-6.33842	2.32e-10	2.38e-09
SLC9A3	23.7991	2.0576	0.324719	6.33655	2.35e-10	2.4e-09
CECR7	11.6501	3.37525	0.532689	6.33625	2.35e-10	2.41e-09
LINC02428	424.268	-2.09966	0.33147	-6.33438	2.38e-10	2.44e-09
CALY	6.34813	3.09004	0.487993	6.33215	2.42e-10	2.47e-09
GOLGA2P7	7.26112	1.56771	0.247587	6.33195	2.42e-10	2.47e-09
B3GNT5	325.287	1.82532	0.288436	6.32834	2.48e-10	2.53e-09
LRRC26	7.19058	4.73143	0.747869	6.32655	2.51e-10	2.55e-09
AC013553.3	1.57644	2.389	0.377685	6.32537	2.53e-10	2.57e-09
FAP	53.9975	2.04346	0.32314	6.32376	2.55e-10	2.6e-09
UBTFL6	1.13463	2.7146	0.429436	6.3213	2.59e-10	2.64e-09
GAS1	96.1596	-1.62687	0.257468	-6.31874	2.64e-10	2.68e-09
MIP	32.05	-1.52801	0.2419	-6.31668	2.67e-10	2.71e-09
NNMT	59092.7	-2.13316	0.337789	-6.31506	2.7e-10	2.74e-09
CHP2	8.22857	6.32332	1.00139	6.31456	2.71e-10	2.74e-09
AC013439.1	3.62126	3.26863	0.517821	6.31228	2.75e-10	2.78e-09
FRRS1L	11.7092	3.38996	0.5371	6.3116	2.76e-10	2.79e-09
ACBD7	6.93565	1.99482	0.316303	6.30666	2.85e-10	2.88e-09
CCR3	11.4351	3.69846	0.586485	6.30614	2.86e-10	2.88e-09
CPE	2103.67	1.58247	0.250979	6.30519	2.88e-10	2.9e-09
AC007342.3	1.72014	-2.22576	0.353031	-6.3047	2.89e-10	2.91e-09
ESCO2	65.811	1.68809	0.267754	6.30462	2.89e-10	2.91e-09
LINC01666	3.64662	3.93704	0.624483	6.30448	2.89e-10	2.91e-09
CYP27C1	27.4278	2.16399	0.343309	6.30335	2.91e-10	2.93e-09
AC069277.1	4.26171	4.75317	0.754127	6.30288	2.92e-10	2.94e-09
SYTL5	146.845	-1.61528	0.256418	-6.2994	2.99e-10	3e-09
BCAS1	83.8455	2.46312	0.391084	6.29819	3.01e-10	3.02e-09
LINC01389	9.75418	1.5255	0.242277	6.29651	3.04e-10	3.05e-09
AC011445.2	8.30569	1.86832	0.296893	6.29292	3.12e-10	3.12e-09
SLC4A3	67.8	2.62395	0.417092	6.29107	3.15e-10	3.15e-09
ERVMER34-1	21.0027	2.41425	0.383901	6.28874	3.2e-10	3.2e-09
CD69	169.894	-1.59349	0.253436	-6.28754	3.23e-10	3.22e-09
SLC16A3	649.833	1.53332	0.24387	6.28742	3.23e-10	3.22e-09
CD5L	2471.16	-2.58224	0.410809	-6.28574	3.26e-10	3.25e-09
FGB	571492	-1.56328	0.248757	-6.28437	3.29e-10	3.28e-09
AL137159.1	2.0701	2.04276	0.325225	6.28107	3.36e-10	3.35e-09
ST6GAL2	120.646	-2.0578	0.32765	-6.28049	3.38e-10	3.36e-09
CYP2W1	7.32131	2.18587	0.348081	6.27977	3.39e-10	3.38e-09
CRLF1	43.2666	1.68737	0.268702	6.27971	3.39e-10	3.38e-09
GPD1	6664.68	-1.58108	0.251804	-6.27899	3.41e-10	3.39e-09
AC104024.1	1.2277	-2.48031	0.395027	-6.27884	3.41e-10	3.39e-09
AVPR2	8.75107	1.8369	0.29266	6.27656	3.46e-10	3.44e-09
LINC01956	8.89052	5.46799	0.871325	6.2755	3.49e-10	3.46e-09
ORM1	249228	-1.62419	0.258818	-6.2754	3.49e-10	3.46e-09
AC011503.3	3.45649	2.90542	0.463011	6.27505	3.5e-10	3.47e-09
CHRND	4.35189	4.29199	0.68405	6.27438	3.51e-10	3.48e-09
AC015468.3	2.53888	-2.49868	0.398357	-6.27246	3.55e-10	3.52e-09
GABBR2	48.9133	3.47143	0.553598	6.27067	3.59e-10	3.56e-09
PLAG1	70.5124	1.83823	0.293331	6.26674	3.69e-10	3.65e-09
CRIM1-DT	44.691	1.78489	0.284839	6.26632	3.7e-10	3.66e-09
DCLK3	7.8285	1.62133	0.258751	6.26597	3.71e-10	3.66e-09
LINC01748	4.07968	4.26401	0.680576	6.2653	3.72e-10	3.68e-09
FPR1	235.087	-1.77603	0.283599	-6.26247	3.79e-10	3.74e-09
IL13RA2	134.981	-2.16799	0.346213	-6.26202	3.8e-10	3.75e-09
HTR1D	34.1063	3.24172	0.518056	6.25747	3.91e-10	3.86e-09
TMEM74	51.8772	1.70245	0.272126	6.25612	3.95e-10	3.89e-09
SEMA3B	568.651	1.85632	0.296813	6.25419	4e-10	3.93e-09
IL1RL1	212.97	-2.70687	0.433238	-6.24801	4.16e-10	4.09e-09
SMIM32	44.8893	3.23295	0.517479	6.2475	4.17e-10	4.1e-09
FALEC	2.67375	2.18938	0.350459	6.24717	4.18e-10	4.1e-09
CTNNA3	213.774	-2.27971	0.364964	-6.24638	4.2e-10	4.12e-09
AC092115.3	3.94496	4.00216	0.640752	6.24603	4.21e-10	4.13e-09
AC008250.2	6.27523	-1.69465	0.271454	-6.24288	4.3e-10	4.2e-09
AL162726.3	9.68327	3.12928	0.501256	6.24287	4.3e-10	4.2e-09
CCDC196	62.6953	-2.283	0.365766	-6.24171	4.33e-10	4.23e-09
LINC02268	2.57038	-1.89919	0.304515	-6.23678	4.47e-10	4.36e-09
AC016737.1	4.26847	1.82035	0.292018	6.2337	4.56e-10	4.44e-09
AL359313.1	4.33729	4.95608	0.795298	6.23173	4.61e-10	4.49e-09
CLEC12B	2.07113	-2.04828	0.328759	-6.23033	4.65e-10	4.53e-09
LINC01694	11.5338	2.49452	0.400451	6.22927	4.69e-10	4.56e-09
AC020907.1	24.0287	1.82722	0.293337	6.2291	4.69e-10	4.56e-09
KCNJ5	121.361	1.69707	0.272448	6.22899	4.69e-10	4.57e-09
UPK1B	7.56865	-2.92654	0.470054	-6.22597	4.79e-10	4.65e-09
ZNF826P	48.2359	1.69776	0.272714	6.22544	4.8e-10	4.66e-09
FSTL5	46.8927	4.03568	0.648421	6.22386	4.85e-10	4.71e-09
GULP1	147.705	2.48686	0.399619	6.22307	4.88e-10	4.73e-09
C19orf67	3.01169	2.81077	0.451735	6.22217	4.9e-10	4.75e-09
BX322639.1	19.2999	2.0826	0.33471	6.22209	4.91e-10	4.75e-09
PPP1R14D	14.0509	3.54001	0.569181	6.21949	4.99e-10	4.83e-09
HIST1H2BE	3.703	1.82845	0.294184	6.21533	5.12e-10	4.95e-09
CDRT1	9.77107	3.05555	0.491779	6.21327	5.19e-10	5.02e-09
KRT12	11.1865	5.86693	0.944284	6.2131	5.19e-10	5.02e-09
PRDM12	4.87526	1.70263	0.274044	6.213	5.2e-10	5.02e-09
ACSL4	8080.76	2.26621	0.36488	6.21083	5.27e-10	5.09e-09
DPYSL4	31.8507	2.33511	0.37598	6.21072	5.27e-10	5.09e-09
INS-IGF2	233.081	-3.56992	0.574932	-6.20929	5.32e-10	5.14e-09
KCNIP3	112.38	1.63188	0.262899	6.20725	5.39e-10	5.2e-09
TNFSF15	59.9224	1.71893	0.276949	6.20666	5.41e-10	5.22e-09
AL109933.4	12.5186	-1.65176	0.266261	-6.20355	5.52e-10	5.31e-09
C1QTNF1-AS1	15.6938	2.7251	0.439417	6.20162	5.59e-10	5.37e-09
STC2	301.105	2.10102	0.338827	6.20085	5.62e-10	5.39e-09
LINC01136	4.38973	2.07252	0.334523	6.19544	5.81e-10	5.57e-09
LINC01139	22.9653	3.6141	0.583671	6.19201	5.94e-10	5.69e-09
SYNGR4	8.79888	2.32534	0.375698	6.18939	6.04e-10	5.78e-09
PURPL	40.0263	2.28478	0.369336	6.18617	6.16e-10	5.9e-09
AC034229.4	2.06006	2.21577	0.358258	6.18484	6.22e-10	5.94e-09
AC112493.1	2.89591	3.72719	0.602654	6.18463	6.22e-10	5.95e-09
AC034213.1	8.74705	4.5461	0.735355	6.18218	6.32e-10	6.03e-09
CLUL1	8.12743	2.32099	0.375434	6.18217	6.32e-10	6.03e-09
RTL9	31.2524	2.36154	0.382035	6.18148	6.35e-10	6.06e-09
PHLDA3	741.031	1.61762	0.261811	6.17855	6.47e-10	6.17e-09
AC068987.3	79.0059	1.70248	0.275658	6.17603	6.57e-10	6.25e-09
AC092490.1	44.9438	3.41297	0.552622	6.17596	6.58e-10	6.26e-09
ERVE-1	7.17394	-2.73172	0.442501	-6.17336	6.69e-10	6.35e-09
LINC00906	3.99247	5.02059	0.813308	6.17304	6.7e-10	6.36e-09
ZNF728	5.55701	3.87671	0.628128	6.17184	6.75e-10	6.4e-09
CEMIP	110.492	2.07076	0.335579	6.17073	6.8e-10	6.45e-09
ICAM5	12.6118	2.34777	0.380892	6.16387	7.1e-10	6.72e-09
DRGX	5.32502	4.71542	0.76503	6.1637	7.11e-10	6.73e-09
ASPA	321.408	-1.6157	0.262157	-6.16311	7.13e-10	6.75e-09
DPEP3	5.7477	-1.83847	0.298392	-6.16127	7.22e-10	6.83e-09
IRX6	2.76468	3.92042	0.636404	6.16027	7.26e-10	6.86e-09
COL1A1	10793.6	1.58574	0.257484	6.15861	7.34e-10	6.93e-09
ESYT3	28.6424	1.92119	0.312036	6.15693	7.42e-10	7e-09
KIF5A	4.20211	2.60231	0.422874	6.15386	7.56e-10	7.13e-09
HIST1H4K	5.40955	1.95945	0.318656	6.14912	7.79e-10	7.34e-09
CBLN1	86.5753	1.88607	0.306727	6.14901	7.8e-10	7.34e-09
PCDH9-AS2	17.7725	-3.01309	0.490226	-6.14633	7.93e-10	7.46e-09
AC090192.2	4.03233	4.85799	0.790678	6.14408	8.04e-10	7.57e-09
LINC01762	4.08305	2.14399	0.348994	6.14334	8.08e-10	7.6e-09
KIAA1549	186.812	1.76691	0.287737	6.14071	8.22e-10	7.71e-09
AC092535.5	51.5334	1.51153	0.246157	6.14051	8.23e-10	7.72e-09
NOCT	546.958	-1.5503	0.25262	-6.13688	8.42e-10	7.88e-09
AL121658.1	3.88279	1.63896	0.267159	6.13478	8.53e-10	7.98e-09
CHRNA5	12.3999	1.80751	0.294754	6.13224	8.66e-10	8.09e-09
DISP2	85.0787	1.73916	0.28363	6.1318	8.69e-10	8.11e-09
RASGEF1A	60.2344	2.30566	0.376038	6.13146	8.71e-10	8.13e-09
MDFI	65.9902	1.90233	0.31026	6.13141	8.71e-10	8.13e-09
FOXF2	12.0247	1.99171	0.324851	6.13116	8.72e-10	8.14e-09
EHF	286.677	1.94849	0.317817	6.13087	8.74e-10	8.15e-09
TBX20	5.247	-2.4131	0.393658	-6.12993	8.79e-10	8.2e-09
LINC02335	4.3583	5.09751	0.831605	6.12972	8.8e-10	8.2e-09
TENM3	43.1074	-2.36989	0.38664	-6.12945	8.82e-10	8.21e-09
CNFN	33.4821	2.36957	0.386747	6.12692	8.96e-10	8.34e-09
AC237221.1	58.4099	2.85598	0.466152	6.12672	8.97e-10	8.34e-09
GLYAT	7892.28	-1.95146	0.318591	-6.1253	9.05e-10	8.41e-09
AC009549.1	16.5453	1.94784	0.318065	6.12402	9.12e-10	8.48e-09
AC099520.1	2.3509	4.3881	0.717933	6.11213	9.83e-10	9.11e-09
ELAVL2	2.66565	2.52627	0.413616	6.10775	1.01e-09	9.34e-09
AC005332.1	3.34704	1.97884	0.324046	6.10667	1.02e-09	9.39e-09
AL603840.1	1.78984	-2.43017	0.398035	-6.10543	1.03e-09	9.46e-09
NAA11	11.08	6.44509	1.05613	6.10258	1.04e-09	9.62e-09
LINC00488	9.0991	3.6525	0.598526	6.10249	1.04e-09	9.62e-09
IGDCC3	5.88076	3.73158	0.611952	6.09783	1.08e-09	9.89e-09
MGAT3	39.6542	1.661	0.27253	6.09476	1.1e-09	1.01e-08
PAGE2B	4.3979	4.2961	0.70565	6.08815	1.14e-09	1.05e-08
HES5	6.75815	2.26859	0.37271	6.08674	1.15e-09	1.05e-08
SULT1C2	232.427	2.61363	0.429406	6.08662	1.15e-09	1.06e-08
KCNJ16	65.2803	-2.49556	0.410034	-6.08623	1.16e-09	1.06e-08
AC005089.1	21.149	1.52201	0.250081	6.08608	1.16e-09	1.06e-08
LRRC19	59.6893	-2.53077	0.415894	-6.08514	1.16e-09	1.06e-08
SLC7A4	15.6399	-2.0326	0.334109	-6.08365	1.17e-09	1.07e-08
TMEM270	11.1737	2.68252	0.440954	6.08344	1.18e-09	1.07e-08
CIB2	82.2444	1.61764	0.266018	6.08093	1.19e-09	1.09e-08
WARS2-IT1	6.6139	-1.86264	0.306372	-6.07965	1.2e-09	1.1e-08
SCGB2A1	9.69328	3.04869	0.501463	6.07958	1.2e-09	1.1e-08
KLK4	8.08393	4.83827	0.795858	6.07931	1.21e-09	1.1e-08
CA8	13.8238	2.17032	0.357249	6.07509	1.24e-09	1.13e-08
AC063977.6	3.57034	-1.70853	0.281391	-6.07172	1.27e-09	1.15e-08
FZD10	6.36562	2.28929	0.377065	6.07134	1.27e-09	1.15e-08
AC100872.2	2.8368	3.08858	0.508761	6.07078	1.27e-09	1.16e-08
AP003419.3	4.51726	1.77098	0.291959	6.06585	1.31e-09	1.19e-08
KCNA3	18.7393	-1.62718	0.268501	-6.06023	1.36e-09	1.23e-08
BPIFB4	3.08651	3.46341	0.571543	6.05975	1.36e-09	1.23e-08
LGALS8-AS1	11.2761	1.62095	0.267551	6.05846	1.37e-09	1.24e-08
LRRN1	24.1864	-2.08349	0.343914	-6.05818	1.38e-09	1.24e-08
PADI3	6.56253	4.88762	0.806889	6.05736	1.38e-09	1.25e-08
HPDL	12.8507	2.2845	0.377177	6.05685	1.39e-09	1.25e-08
CYP4A22-AS1	3.01654	1.93409	0.319633	6.05096	1.44e-09	1.3e-08
IL1RAPL2	35.1458	-2.05137	0.339095	-6.04956	1.45e-09	1.31e-08
AC007040.2	2.39707	-2.12538	0.351425	-6.04788	1.47e-09	1.32e-08
KIAA1614-AS1	2.47505	2.41637	0.39962	6.04666	1.48e-09	1.33e-08
HIST1H2BL	1.95723	2.55083	0.421954	6.04529	1.49e-09	1.34e-08
STEAP1B	3.26346	2.03763	0.337232	6.04221	1.52e-09	1.37e-08
FZD10-AS1	9.79095	2.21633	0.367113	6.03719	1.57e-09	1.41e-08
DKKL1	7.92536	1.99043	0.329705	6.03698	1.57e-09	1.41e-08
KLHL38	4.23308	3.02879	0.501742	6.03654	1.57e-09	1.41e-08
NRK	16.6238	-1.68212	0.278915	-6.03094	1.63e-09	1.46e-08
SH3RF3	225.172	1.52347	0.252794	6.02655	1.67e-09	1.5e-08
TMEM132C	6.41956	-2.65389	0.440414	-6.0259	1.68e-09	1.5e-08
AL357079.1	5.98017	1.50693	0.250305	6.02038	1.74e-09	1.55e-08
MSC-AS1	153.782	1.83846	0.305386	6.02012	1.74e-09	1.56e-08
AC097515.1	2.28882	3.77573	0.627242	6.01957	1.75e-09	1.56e-08
AC125603.2	6.19218	2.74287	0.455664	6.01951	1.75e-09	1.56e-08
CAMP	2.51202	-2.131	0.354134	-6.0175	1.77e-09	1.58e-08
AL512652.1	1.21238	2.44007	0.405757	6.01362	1.81e-09	1.62e-08
DPF1	3.97837	2.10486	0.350099	6.01217	1.83e-09	1.63e-08
AL355482.1	27.4711	2.12693	0.354188	6.00508	1.91e-09	1.7e-08
AC010333.1	3.31589	4.50835	0.751063	6.00263	1.94e-09	1.72e-08
FP325335.1	2.00158	3.35188	0.558646	6.00001	1.97e-09	1.75e-08
AL121772.1	5.41143	1.74755	0.291338	5.99836	1.99e-09	1.77e-08
AL139220.2	5.71438	1.66187	0.27709	5.99759	2e-09	1.78e-08
PKD1L2	50.2526	2.16066	0.36033	5.99632	2.02e-09	1.79e-08
SLC27A6	1.86745	-2.84212	0.474276	-5.99255	2.07e-09	1.83e-08
PCNX2	130.55	1.60793	0.268323	5.99252	2.07e-09	1.83e-08
UGT2B10	17440.7	-1.52191	0.254035	-5.99093	2.09e-09	1.84e-08
MT1B	32.9849	-4.32582	0.722387	-5.98823	2.12e-09	1.87e-08
CARNS1	95.9419	1.75812	0.293669	5.98673	2.14e-09	1.89e-08
RPL12P35	4.75437	2.54003	0.424369	5.98543	2.16e-09	1.9e-08
ACP4	4.21078	2.57289	0.429931	5.98442	2.17e-09	1.91e-08
SHBG	2867.42	-1.94379	0.324895	-5.98284	2.19e-09	1.93e-08
BFSP2	5.60692	2.81572	0.470773	5.98106	2.22e-09	1.95e-08
PM20D1	7.65501	-1.783	0.298163	-5.97995	2.23e-09	1.96e-08
C3P1	7173.39	-1.78369	0.298388	-5.97778	2.26e-09	1.99e-08
TSPEAR-AS2	46.2298	2.08942	0.349628	5.97613	2.28e-09	2.01e-08
FER1L5	5.42872	2.22361	0.372303	5.97256	2.34e-09	2.05e-08
HIST1H3J	0.902652	2.66863	0.446816	5.97256	2.34e-09	2.05e-08
AC010333.2	2.7799	4.12376	0.690688	5.97051	2.37e-09	2.07e-08
F9	20898.3	-1.76819	0.296231	-5.96893	2.39e-09	2.09e-08
TRPM5	3.37636	2.94566	0.493931	5.96372	2.47e-09	2.16e-08
IBA57-DT	2.59682	2.19799	0.368899	5.95825	2.55e-09	2.23e-08
SYT4	0.922781	-2.69372	0.45223	-5.95653	2.58e-09	2.25e-08
AC106820.3	9.8097	1.59712	0.26814	5.9563	2.58e-09	2.25e-08
MSH4	3.47817	2.19161	0.368091	5.95399	2.62e-09	2.28e-08
AC087164.2	189.109	-2.05928	0.345932	-5.95283	2.64e-09	2.3e-08
MT1P3	17.8808	-3.3156	0.557206	-5.95041	2.67e-09	2.33e-08
AC097641.2	3.29616	1.50733	0.253373	5.94905	2.7e-09	2.34e-08
DCAF4L1	8.03824	1.62732	0.273601	5.94778	2.72e-09	2.36e-08
SPIC	16.3291	-1.76613	0.296951	-5.94755	2.72e-09	2.36e-08
PSMC1P10	2.20958	3.26786	0.549746	5.94431	2.78e-09	2.41e-08
DGCR9	13.1421	2.16944	0.365346	5.93803	2.88e-09	2.49e-08
GNAT1	21.7026	1.5078	0.253932	5.93781	2.89e-09	2.5e-08
NOVA1	92.8579	1.99932	0.336768	5.93678	2.91e-09	2.51e-08
AC004160.2	11.6468	-2.00283	0.33778	-5.92939	3.04e-09	2.62e-08
LIPJ	4.06417	-1.62074	0.273353	-5.92912	3.05e-09	2.63e-08
AVPR1A	3143.96	-2.49778	0.421383	-5.92757	3.07e-09	2.65e-08
CHST6	5.96165	2.56972	0.433645	5.92586	3.11e-09	2.67e-08
ZNF492	5.44042	2.81265	0.47486	5.92311	3.16e-09	2.72e-08
ADAMTS18	5.24279	2.56232	0.432608	5.92294	3.16e-09	2.72e-08
NAV3	124.896	1.83247	0.309449	5.92172	3.19e-09	2.73e-08
IL17B	1.89278	2.81548	0.475524	5.9208	3.2e-09	2.75e-08
TSPAN8	2526.65	1.7751	0.299906	5.91888	3.24e-09	2.78e-08
TCL6	9.41969	2.82472	0.477363	5.91733	3.27e-09	2.8e-08
TPPP2	166.515	-1.77627	0.300188	-5.91718	3.27e-09	2.8e-08
LINC01446	15.3361	4.88632	0.825972	5.91584	3.3e-09	2.82e-08
LINC02438	2.68104	3.51001	0.593451	5.91457	3.33e-09	2.85e-08
NCKAP5-AS2	3.06617	-1.62696	0.275111	-5.91384	3.34e-09	2.86e-08
AC092821.1	5.7912	1.62513	0.274841	5.91298	3.36e-09	2.87e-08
AC092957.1	4.56416	5.16107	0.873274	5.91002	3.42e-09	2.92e-08
LINC01561	2.47672	-2.41361	0.408465	-5.90897	3.44e-09	2.94e-08
AL021807.1	7.58393	2.13574	0.361448	5.90883	3.45e-09	2.94e-08
AC093458.2	6.53476	1.9758	0.334505	5.90664	3.49e-09	2.97e-08
PGK1P2	2.72037	1.59998	0.270899	5.9062	3.5e-09	2.98e-08
CCDC144NL-AS1	56.0682	1.92743	0.326493	5.90344	3.56e-09	3.03e-08
AC092809.2	12.8302	-1.99838	0.338538	-5.90296	3.57e-09	3.04e-08
[truncated: 2,112 more rows]
